## 1 **Title**

2 Signatures of adaptive evolution in platyrrhine primate genomes.

## 3 **Authors**

4 Hazel Byrne,<sup>1,2,\*</sup> Timothy H. Webster,<sup>1</sup> Sarah F. Brosnan,<sup>3</sup> Patrícia Izar,<sup>4,†</sup> Jessica W. Lynch<sup>2,5,†</sup>

## 6 **Affiliations**

7 <sup>1</sup>Department of Anthropology, University of Utah, Utah, USA.

8 <sup>2</sup>Institute for Society and Genetics, University of California Los Angeles, California, USA.

9 <sup>3</sup>Language Research Center, Department of Psychology, Center for Behavioral Neuroscience,  
10 Georgia State University, Atlanta, Georgia, USA.

11 <sup>4</sup>Department of Experimental Psychology, University of São Paulo, São Paulo, Brazil.

12 <sup>5</sup>Department of Anthropology, University of California Los Angeles, California, USA.

13 <sup>†</sup>These authors contributed equally

14 <sup>\*</sup>To whom correspondence should be addressed: [byrne.hazell@gmail.com](mailto:byrne.hazell@gmail.com)

## 16 **Abstract**

17 The family Cebidae (capuchin and squirrel monkeys) form a remarkable platyrrhine clade  
18 exhibiting among the largest primate encephalisation quotients. Each cebid lineage is  
19 characterised by notable lineage-specific traits, with capuchins showing striking similarities to  
20 Hominidae including high sensorimotor intelligence with tool use, advanced cognitive abilities,  
21 and behavioural flexibility. Here, we take a comparative genomics approach, analysing five cebid  
22 branches including successive lineages, to infer a stepwise timeline for cebid adaptive evolution.  
23 We uncover candidate targets of selection across various periods of cebid evolution that may  
24 underlie the emergence of lineage-specific traits. Our analyses highlight shifting and sustained  
25 selective pressures on genes related to brain development, longevity, reproduction, and  
26 morphology, including evidence for cumulative and diversifying neurobiological adaptations over  
27 cebid evolutionary history. In addition to generating a new, high-quality reference genome  
28 assembly for robust capuchins, our results lend to a better understanding of the adaptive  
29 diversification of this distinctive primate clade.

## 31 **Keywords**

32 Neotropical primates, positive selection, comparative genomics, brain evolution, Cebidae

## 34 **MAIN TEXT**

### 35 **Introduction**

36 Platyrrhine primates (also known as Neotropical primates) present a striking example of the  
37 adaptive diversification of a primate clade into diverse ecological niches. Platyrrhines of South  
38 and Central America and catarrhines of Africa and Asia (and extinct forms from Europe) likely  
39 diverged via transatlantic dispersal of the platyrrhine ancestor from Africa to South America 40 to  
40 44 million years ago (mya), with the earliest South American fossils resembling small Eocene  
41 African anthropoids (1, 2). The crown platyrrhine radiation began to diversify 20 to 25 mya, with  
42 most of the extant diversity contained in the rainforests of Amazonia and the Atlantic Forest  
43 biome (1, 3). It has been suggested that ecological opportunity across multidimensional niches in  
44 expanding rainforest environments may have driven the diversification of major platyrrhine  
45 lineages, leading to the evolution of a plethora of forms with over 20 extant genera and 170 extant  
46 species (4, 5). Platyrrhine primates show striking phenotypic diversity in body and brain size,  
47 skeletal morphology, pelage patterns, group size, social and mating systems, life history and  
48 longevity, behavioural plasticity, diet and dietary adaptations, among many other traits, with this  
49 diversity becoming increasingly well characterised in recent years. We know very little, however,  
50

51 about the genetic changes involved in the evolution of this incredible array of diversity and where  
52 in the platyrrhine clade those changes occurred.

53 While all major platyrrhine groups show lineage-specific traits, the family Cebidae  
54 (capuchin and squirrel monkeys, following (6) and current IUCN Red List Taxonomy) are  
55 compelling considering their large encephalisation quotient (EQ; relative brain to body size), with  
56 reconstructions showing one of the fastest increases in EQ across primates along the ancestral  
57 Cebidae branch (7). Capuchins (subfamily Cebinae) are a particularly remarkable platyrrhine  
58 clade with many striking similarities to Hominidae including social conventions and traditions,  
59 complex relationships, high dexterity, sensorimotor intelligence with tool use and extractive  
60 foraging, advanced derived cognitive abilities, diverse behavioural repertoire and flexibility, and  
61 slow maturation (8). These traits are uncommon or absent among other platyrrhines and it is of  
62 great anthropological interest to gain insight into the evolutionary mechanisms underlying the  
63 independent emergence of these convergent traits and their associated genomic changes. The  
64 existence of two capuchin lineages (gracile and robust) with both shared and derived traits  
65 (including differences in cranial and post-cranial skeletal morphology, tool use, social and sexual  
66 behaviours, etc.), which diverged within a similar timeframe to *Homo* and *Pan*, brings further  
67 interest to understand their distinct evolutionary trajectories. Squirrel monkeys (genus *Saimiri*),  
68 the sister group to capuchins, are also characterised by slow maturation and large EQ, but lack  
69 other parallels to apes and humans described above for capuchins. Squirrel monkeys are hyper-  
70 gregarious with the largest stable social groups among platyrrhines, and frequently engage in  
71 mixed-species associations, especially with capuchins (9). Squirrel monkeys are also a key  
72 primate biomedical model with foci on neuroendocrinology, ophthalmology, pharmacology,  
73 behaviour, viral persistence, infectious diseases, cancer treatment, and reproductive physiology,  
74 among others (10).

75 Here, we take a comparative genomics approach to uncover signatures of adaptive  
76 evolution in cebid genomes to better understand the adaptive diversification of this distinctive  
77 platyrrhine primate clade. We focus on the three extant cebid lineages—robust capuchins (genus  
78 *Sapajus*), gracile capuchins (genus *Cebus*), and squirrel monkeys (genus *Saimiri*)—as well as the  
79 ancestral capuchin (Cebinae) and ancestral Cebidae branches. Through the analysis of successive  
80 lineages in the platyrrhine phylogeny, we are able to infer a stepwise timeline for cebid adaptive  
81 evolution and identify candidate adaptive genes that may underlie the emergence of lineage-  
82 specific traits. Previous work assessing signatures of adaptive evolution in protein-coding regions  
83 for cebid lineages considered the entire capuchin subfamily (Cebinae) together as represented by  
84 a single species (*Cebus imitator*), uncovering broad signatures of positive selection on the brain  
85 and DNA repair (which was associated with longevity) (11), or focused on signatures of  
86 convergence among encephalised primate lineages including humans (12). This work greatly  
87 expands upon these existing studies by individually analysing five distinct cebid branches to infer  
88 the targets of selection during various time periods of cebid evolution.

89

## 90 **Results**

### 91 ***Robust capuchin reference genome***

92 At the start of this study, annotated genome assemblies were publicly available for *Cebus imitator*  
93 and *Saimiri boliviensis*. We generated a new genome assembly for *Sapajus apella* using short-read  
94 data (~148-fold coverage) scaffolded with Dovetail's Chicago proximity ligation libraries (Table  
95 S1) using their HiRise pipeline (13). Total length of this genome assembly was 2,520 Mbp (in 6631  
96 scaffolds) with an N50 of 27.1 Mbp (29 scaffolds) and N90 of 4.04 Mbp (116 scaffolds). We  
97 identified 91.5% (5,666) of BUSCO's (14) Euarchontoglires-specific conserved single-copy  
98 orthologs in the assembly including 85% (5,264) complete (with 0.6% duplicated) and 6.5% (402)  
99 fragmented; and 90.3% (224) of CEGMA's (15) core eukaryotic genes (CEGs). Together, assembly  
100 metrics and genome completeness based on gene content indicate a contiguous, high-quality

reference genome assembly for robust capuchins (*Sapajus*). We estimated genome size with filtered short read data based on  $k$ -mer (31-mer) frequencies using the four approaches resulting in an estimated haploid genome length for our *S. apella* reference individual between 2,918 and 3,029 Mbp (Table S2). Previous estimates of genome size for other robust capuchin species, *Sapajus libidinosus* and *Sapajus nigritus*, estimated using Feulgen image analysis densitometry, ranged between 3,276-3,374 Mbp and 2,921-3,025 Mbp, respectively (16). These estimates, in particular for *S. nigritus*, are very similar to our estimates for *S. apella* calculated in this study.

We pooled raw RNAseq data (367 million read pairs) derived from total RNA from 17 tissues from the same reference individual and, post-filtering, retained 341 million read pairs (Table S3). We assessed quality metrics and completeness of the seven transcript assemblies generated using cleaned RNAseq read pairs with rnaQUAST (17) and BUSCO, which revealed that upwards of 94% of the transcripts aligned to the genome with an average aligned percentage of greater than 92.7%, and indicated the final assemblies used in downstream analyses (TrinDNv2, PASA v1, and NRv1) were high-quality, near complete transcriptomes (~96 to 97% complete) (Table S4). Repeat annotation of the genome assembly using libraries of both known and *de novo* elements estimated the total interspersed content of the genome as 43.02% (1.06 Gbp), and total annotated repeat content (including transposable elements as well as small RNA, satellites, simple repeats, and low complexity repeats) as 44.63% (1.12 Gbp) (Table S5). After three iterations of Maker (18, 19) to predict and annotate gene models in the robust capuchin genome assembly (Table S6) and subsequent filtering, we recovered 25,279 predicted genes for *S. apella* for downstream analyses.

### **Ortholog alignment & branch/branch-site model tests**

We initially identified 12,160 one-to-one orthologs recovered in at least two of the ten species we used in our comparative genomic analyses; these include nine primates, of which four are platyrrhines, and mouse (Figure 1; Table S7). After filtering for a minimum of five species and the presence of at least one capuchin lineage (gracile or robust), alignment using Guidance2 (20) with 100 bootstraps, and filtering for errors to reduce the likelihood of false positives, we retained a set of 9,216 conservative, manually-curated CDS alignments which were highly likely to represent one-to-one ortholog groups across their length. Detailed information on each of the final alignments, including group ID, assigned gene symbol, and Entrez ID can be found in Table S8. In total, there were 207 different combinations of species (species sets) represented in the final alignments (Table S9), with most alignments assigned to the set of all species (full) (N = 4,636) or sets with nine species (N = 2,819), and the rest to sets with between eight and five species (N = 1,761) (Tables 1, S10).

These 9,216 alignments were used as input to our codon-based models of evolution based on non-synonymous versus synonymous substitutions ( $\omega$  or dN/dS ratio) to identify candidate genes under selection in six cebid lineages of interest (Figure 1); (H1) robust capuchin (*Sapajus*); (H2) gracile capuchin (*Cebus*); (H3) ancestral Cebinae (capuchins); (H3a) across-capuchins (all Cebinae; branches H1, H2, and H3 combined); (H4) ancestral Cebidae (i.e., ancestor to capuchins and squirrel monkeys); and (H5) squirrel monkey (*Saimiri*).

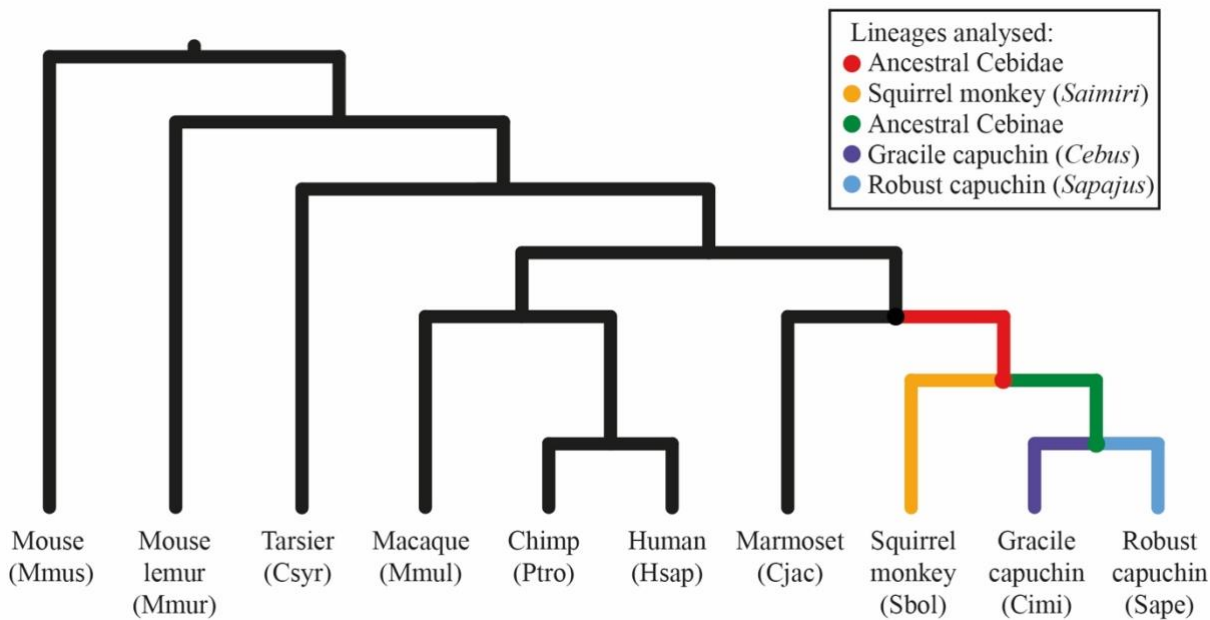

142  
143 **Figure 1** Phylogenetic reconstruction showing the consensus guide tree topology and the cebid  
144 branches assessed for signatures of positive selection. H3a is not shown, but includes branches for  
145 Cimi, Sape, and their ancestor.  
146

147 In total we tested 86,485 models for 11 lineage and test combinations using codeml from  
148 PAML (21); 47,744 branch models (BM) across all six lineages, which tests for elevated dN/dS  
149 ratios along the target branch indicating accelerated evolution; and 38,741 branch-site models  
150 (BSM) across five lineages (excluding H3a), which tests for episodic selection by searching for  
151 positively selected sites in the target lineage. Groups (alignments) analysed per lineage varied  
152 between 6,978 and 9,003 of 9,216 total (Tables 1, S10), with averages of 7,957 BM and 7,748 BSM  
153 tests. Across the six lineages analysed for BM, we recovered 248 to 552 (avg. 351) models with  
154 significant signatures of accelerated evolution. In contrast, across the five lineages analysed for  
155 BSM, we found 75 to 186 (avg. 113) models with significant signatures of episodic positive  
156 selection, much fewer than for BM tests particularly for shorter branches for the capuchin lineages.  
157 Between 17 and 34 (avg. 25) groups are significant for both BM and BSM tests for the same lineage  
158 (Tables 1, S10). Lists of all groups (genes) analysed for each of the six lineages, along with  
159 significance for BM and/or BSM tests, can be found in Tables S11–S16. More detailed information  
160 for the groups with significant evidence of accelerated evolution or episodic selection from the BM  
161 and/or BSM tests including p-value, LRT statistic, and likelihood scores is located in Tables S17–  
162 S22.  
163

### 164 **Gene set enrichment**

165 Gene set enrichment analyses using DAVID v.6.8 (22) for each set of significant genes from each  
166 combination of lineage and test (six BM, five BSM) aided interpretation of the biological  
167 significance of the results. We assessed lists of enriched BP (biological process), CC (cellular  
168 component), and MF (molecular function) gene ontology (GO) terms, UP keywords, KEGG  
169 pathways, Reactome pathways, and disease annotations, as well as functional annotation clustering  
170 across the three GO terms together under the high classification stringency criteria, with an EASE  
171 score of < 0.05 required for all enriched annotated terms. Across all lineages for the BM and BSM  
172 gene sets, we recovered between 2 to 13 (avg. 6) and 0 to 9 (avg. 3) GO clusters, and 68 and 189  
173 (avg. 103) and 10 to 123 (avg. 60) enriched terms (all annotation categories), respectively (Table  
174 S23). Information on each of the enriched annotated terms and GO clusters including description,



175 gene counts and hits, and statistical results such as EASE score and fold enrichment, for each gene  
176 set enrichment analysis are found in Tables S24–S44. We briefly summarise the gene set  
177 enrichment results in Table 2. A more detailed written summary of the gene set enrichment results  
178 for each lineage is presented in the supplementary materials.  
179

**Table 1** Counts of groups and significant results for BM and BSM tests with PAML.

|                               | Total groups | Groups with all species | Groups with 9 species | Groups with < 9 species | Significant models: BM | Significant models: BSM | Overlap BM & BSM |
|-------------------------------|--------------|-------------------------|-----------------------|-------------------------|------------------------|-------------------------|------------------|
| <b>Robust capuchin (H1)</b>   | <b>7,010</b> | 4,636                   | 1,695                 | 679                     | <b>292</b>             | <b>80</b>               | 17               |
| <b>Gracile capuchin (H2)</b>  | <b>7,010</b> | 4,636                   | 1,695                 | 679                     | <b>248</b>             | <b>75</b>               | 18               |
| <b>Ancestral Cebinae (H3)</b> | <b>6,978</b> | 4,636                   | 1,695                 | 647                     | <b>302</b>             | <b>122</b>              | 30               |
| <b>Across-Cebinae (H3a)</b>   | <b>9,003</b> | 4,636                   | 2,756                 | 1,611                   | <b>552</b>             | NA                      | NA               |
| <b>Ancestral Cebidae (H4)</b> | <b>8,740</b> | 4,636                   | 2,701                 | 1,403                   | <b>278</b>             | <b>104</b>              | 26               |
| <b>Squirrel monkey (H5)</b>   | <b>9,003</b> | 4,636                   | 2,756                 | 1,611                   | <b>435</b>             | <b>186</b>              | 34               |
| <b>Average</b>                | <b>7,957</b> | 4,636                   | 2,216                 | 1,105                   | <b>351</b>             | <b>113</b>              | 25               |

180

181

## Discussion

182

183

184

185

186

187

188

189

190

191

192

193

194

195

196

197

198

199

200

201

202

203

204

Our analyses reveal signatures of positive selection on many lineage-specific traits across Cebidae and highlight branches with strong selective pressure on genes related to brain development and function, longevity, behaviour, reproduction, and morphology (Figure 2). Perhaps most striking are the sustained signatures of positive selection on brain evolution across Cebidae, which appear early in cebid history with subsequent selection on different aspects of central nervous system (CNS) development at various time intervals for different lineages. While we recover an evolutionary trajectory of encephalisation beginning in ancestral Cebidae and continuing independently in squirrel monkeys and capuchins, the strongest evidence for selection on neuroplasticity, behavioural flexibility, and manual dexterity is found for ancestral Cebinae or the entire capuchin clade when considered together (across-capuchins). The most striking signatures of selection recovered independently for the capuchin genera relate to their body shape and skeletal morphology, including the distinctive robust cranial and skeletal morphology in robust capuchins (*Sapajus*), and, conversely, the gracile limb morphology associated with more rapid, agile movement in gracile capuchins (*Cebus*). All three extant cebid genera are long-lived for their body size, and each shows independent signatures of selection on genes related to aging, longevity, and/or neurodegeneration. In addition, in contrast to other closely related taxa, all three cebid genera live in relatively large groups with polygynandry and complex sexual interactions, and we recover signatures of sustained positive selection related to sperm production/morphology and reproductive behaviour. Our comparative approach to uncovering candidate targets of positive selection within Cebidae highlights shifting and sustained selective pressures within this clade, including evidence for cumulative and diversifying neurobiological adaptations over cebid evolutionary history. In the following sections, we discuss our results describing adaptive evolutionary change in these lineages across various biological categories.

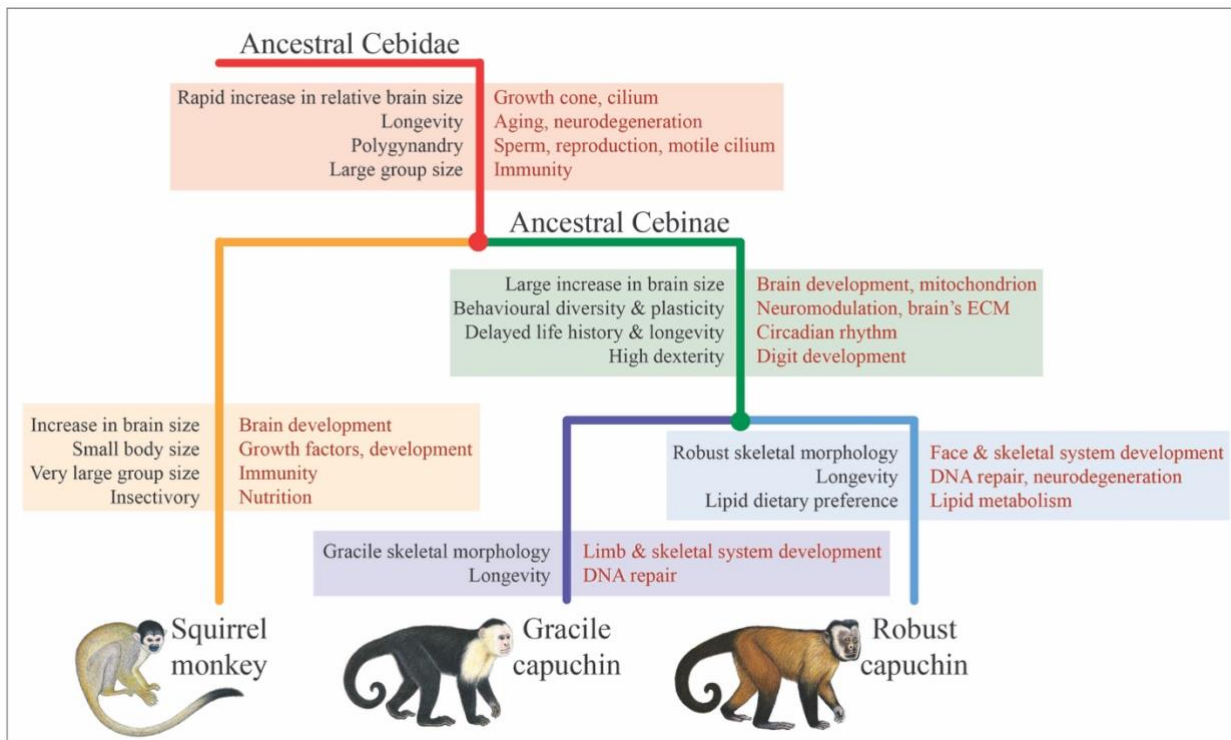

**Figure 2** Graphic summary of select signatures of adaptive evolution per cebid lineage. On the left are traits associated with each branch, which for the ancestral lineages are inferred based on traits shared by all daughter lineages. Brain size changes are based on (7). On the right (in red text) are the associated signatures of adaptive evolution. H3a is not shown. Illustrations by Stephen Nash ©.

### ***Neurodevelopment and plasticity***

A major hallmark of primate evolution is expansion of the brain, with numerous independent shifts to larger brain mass relative to body size also occurring among different primate lineages. Larger brains have long been associated with increased cognitive capabilities, higher social complexity, and increased ability to respond to environmental and socioecological challenges (23). The most encephalised primates after humans are platyrrhines of the family Cebidae—capuchins and squirrel monkeys (11, 24)—and ancestral state reconstructions have indicated that the second fastest increase in the rate of encephalisation across primates occurred along the ancestral Cebidae branch (7). Overall, our results are consistent with an evolutionary trajectory of encephalisation and adaptive brain evolution beginning in ancestral Cebidae and continuing independently in both squirrel monkeys and capuchins after their divergence around 13.8 million years ago (25).

We recovered signatures of selection and accelerated evolution on the CNS that may be associated with this encephalisation shift—in particular, related to brain development and patterning. For the ancestral Cebidae branch, we recovered the enriched CC term “growth cone”, a motile, sensory structure that plays a critical role in precisely specified brain wiring patterns, guiding axons to their targets during neural development, and is also essential in the mature brain for plasticity-dependent synaptogenesis (26). Growth cone dynamics and axonal tract development are regulated by ciliary signalling (27), and, notably, some of the strongest selective signatures for ancestral Cebidae are related to the cilium (both primary and motile, as well as microtubules). Many of the most enriched terms are cilium-specific and including a suite of genes with essential roles in ciliogenesis and implicated in the ciliopathy Joubert’s syndrome. Primary cilia are found in almost all mammalian cells and the range of symptoms characterising ciliopathies highlights the difficulty in associating the signal of selection on cilium with a single

236 adaptive function; it is notable, however, that many of these disorders are characterised by  
237 pronounced neurodevelopmental abnormalities. Primary cilia are critical to the development of  
238 the CNS, playing essential roles in early patterning, neurogenesis, and neuronal migration and  
239 connectivity, at least in part owing to their essential role in mediating signal transduction in key  
240 signalling pathways (28). Taken together, these results suggest adaptive evolution of the CNS and  
241 brain patterning in ancestral Cebidae, which may be linked to the increase in brain size found  
242 along this branch.

243 After the Cebinae/Saimirinae divergence, relative brain size of both squirrel monkeys and  
244 capuchins is modelled to have increased independently at a similar rate. For squirrel monkeys, it  
245 is explained by a reduction in body size and moderate increase in brain size, while for capuchins  
246 it is driven by a large increase in brain size along with a smaller increase in body size (7). In  
247 agreement with this, we find continued brain-related signatures of selection in both lineages. For  
248 squirrel monkeys, we recovered various enriched brain-related GO terms for the BSM gene set  
249 including “regulation of neuron differentiation”, “nervous system development”, and  
250 “neurogenesis”, among others. A gene in the squirrel monkey gene set is *ADCYAPI*, which is  
251 accelerated in humans and has been associated with human brain size evolution (29). Some of  
252 these signatures for squirrel monkeys may also relate to the adaptive maintenance of a large brain  
253 size while reducing body size.

254 Capuchins are particularly notable for their large brains and high EQs, the latter second  
255 only to humans among primates (30), and other hallmarks of their evolution include their derived  
256 cognitive abilities, sensorimotor intelligence, diverse behavioural repertoire, and extensive  
257 behavioural plasticity (8). Capuchins show striking convergence with great apes (particularly  
258 humans) across these traits, which are uncommon among other platyrrhines. Related to these  
259 traits, we recover the enriched BP GO term “CNS development” (BSM gene set) for ancestral  
260 Cebinae with important developmental genes such as *GDF7*, which contributes to neuronal cell  
261 identity in the developing embryonic nervous system. As with ancestral Cebidae, we also find  
262 signatures of enrichment related to cilia for ancestral Cebinae (in both gene sets) with several  
263 genes involved in primary cilium function that are also found in the “CNS development” GO term  
264 (such as *CEP162* and *BBS7*) and implicated in ciliopathies including Seckel and Bardet-Biedl  
265 syndrome. Orkin et al. (11) also found signatures of adaptive evolution related to brain  
266 development and neurogenesis for *Cebus imitator*. Importantly, however, our study places these  
267 positive selection pressures for brain development as most strongly affecting the ancestral  
268 Cebidae and Cebinae lineages; this suggests that brain organisation and function may have  
269 become relatively stable with only minor divergence across the two capuchin genera despite their  
270 subsequent divergent ecological and morphological adaptations (but see below for some brain-  
271 related genes of interest).

272 Behavioural repertoires are manifestations of neural activity and changes in behaviour are  
273 ultimately followed by alterations in neuronal connectivity i.e., neuroplasticity (31). We found  
274 further brain-related signatures for capuchins putatively associated with this trait. Two highly  
275 ranked genes in the “CNS development” GO term for ancestral Cebinae encode chondroitin  
276 sulphate proteoglycans (CSPGs) of the lectican family that are specifically expressed in the CNS:  
277 *NCAN* (neurocan), the 4<sup>th</sup> ranked gene in the BSM gene set, and *BCAN* (brevican), the 2<sup>nd</sup> ranked  
278 gene in the BM gene set and also in the BSM gene set. These CSPGs serve as guidance cues  
279 during brain development, as well as play important roles in neuroplasticity by modulating  
280 synaptic connections in the adult brain. They are abundant components of the brain’s extracellular  
281 matrix, forming condensed lattice-like structures known as perineuronal nets (PNNs) that form as  
282 one of the ultimate acts coinciding with the closure of critical periods for experience-dependent  
283 plasticity. The relationship between neurons and PNNs is a central mechanism controlling  
284 neuroplasticity, with PNNs playing many important roles in CNS functions including regulating  
285 synaptic plasticity, stabilising synapses, and neuroprotection. They are involved in cognition

through encoding, maintaining, and updating memories, as well as recovery after nervous system damage, psychiatric disease, and neurodegeneration (32, 33). It is therefore significant that two of the most central and abundant components of PNNs, the CSPGs brevican (*BCAN*) and neurocan (*NCAN*), show strong signatures of selection in ancestral Cebinae, with *BCAN* also selected in *Cebus* and *NCAN* also selected in *Sapajus*. Indeed, signatures of selection potentially related to synaptic plasticity appeared even earlier along the ancestral Cebidae branch given the importance of the growth cone for plasticity-dependent synaptogenesis, as discussed.

For the across-capuchin gene set, we recover strong signatures related to neurotransmission and vesicle fusion including six genes encoding synaptotagmin and synaptotagmin-like proteins which are known to play important roles in regulated neurotransmitter release and hormone secretion. Among these genes is *SYT11*, which forms an essential component of a neuronal vesicular trafficking pathway crucial for development and synaptic plasticity, and plays an important role in dopamine transmission (34). Other related genes for the across-capuchin gene set are involved in the regulation of synaptic AMPA receptors, which play a key role in synaptic plasticity being involved in long-term potentiation and depression of synaptic transmission in the hippocampus; and encoding or interacting with neurexins, neuronal cell surface proteins involved in synaptic contacts and transmission.

Although the brain-related signatures are strongest for the ancestral cebid lineages, we also find distinct significantly accelerated genes related to neurodevelopment in each of the capuchin genera suggesting some, perhaps minor, continuation of adaptive brain evolution independently in robust and gracile capuchins after their divergence around 5 to 6 million years ago. This signature is more notable for robust capuchins; we recover enriched terms related to cilia including the UP keywords “cilium” and “Bardet-Biedl syndrome”, and the CC GO term “MKS complex,” covering three genes involved in ciliogenesis and required for the formation of primary non-motile cilium. One of these is *AH11*, which is required for both cerebellar and cortical development in humans, and may play a crucial role in ciliary signalling during cerebellum embryonic development as a positive modulator of classical Wnt signalling (35). *AH11* also shows an accelerated rate of evolution along the human lineage since the split from chimpanzees and bonobos (36). For gracile capuchins, the enriched UP keyword “developmental protein” contains multiple genes with important roles in CNS development.

### ***Mitochondria and energy metabolism***

The brain is one of the most metabolically expensive organs in the vertebrate body and large brains are, therefore, an evolutionarily costly adaptation (37). Tissues with high energy requirements, such as the brain, are highly dependent on mitochondria with hundreds to thousands within a single neuron (38). Signatures of adaptive evolution in nuclear-encoded mitochondrial genes have been found in large brained/encephalised mammals including the elephant and anthropoid primates generally (39–41), as well as in bats which have a high energy demand owing to flight (42). Mitochondria also play many important roles in the nervous system including in neurotransmitter metabolism, neurogenesis, neuroplasticity, and nervous system development, and are strongly implicated in aging (43, 44). We find recurrent signatures of selection on the mitochondrion in multiple cebid lineages. This signature is the strongest in ancestral Cebinae with recurrent, sweeping signatures across many annotation categories in the BM gene set including specific enriched terms related to the mitochondrial inner membrane and protein complexes which underlie the role of the mitochondrion as the cell’s powerhouse. The ancestral capuchin branch is where absolute brain volume shows both the greatest total increase and the fastest rate of increase among Cebidae branches (7), supporting the putative relationship between this signature, encephalisation, and the high energy requirements of large brains.

We also recover enriched broad mitochondrial terms for across-capuchins and ancestral Cebidae shared with the ancestral Cebinae branch, as well as additional signatures shared between



336 across-capuchins and squirrel monkeys specific to nuclear-encoded mitochondrial ribosomal  
337 proteins (which form mitoribosomes) and the translation of essential mitochondrial mRNAs.  
338 Although signatures are sometimes shared across lineages, the genes involved usually differ; for  
339 example, there are four and six nuclear-encoded mitochondrial ribosomal genes for the across-  
340 capuchins and squirrel monkey branches, respectively, but with no overlapping genes. These  
341 results further support an evolutionary trajectory of encephalisation initiating in ancestral  
342 Cebidae, and continuing independently in capuchins and squirrel monkeys.

### 343 ***Longevity, aging, and neurodegeneration***

344 The cognitive advantages of a large brain should have an adaptive impact by reducing mortality  
345 thereby allowing selection to favour a longer life (45, 46). In this regard, the parallels between  
346 humans and capuchins are striking: capuchin monkeys have slow maturation and extended  
347 juvenescence reaching maturity at around 8 to 10 years old. Capuchin monkeys are among the  
348 most long-lived primates, reaching over 50 years in captivity, though life expectancy is thought to  
349 be much lower in the wild (47, 48) (Perry, pers. comm.). Consistent with this, we recovered broad  
350 signatures of selection on aging and related processes across various capuchin branches.

351 The maintenance of genomic stability is considered a major factor underlying human  
352 longevity with the accumulation of macromolecular damage, such as DNA damage, one of the  
353 most significant factors contributing to aging (49). We recover signatures of selection on DNA  
354 damage and repair related genes for both the robust and gracile capuchin branches independently,  
355 including enriched terms such as “double strand break repair”, “cellular response to DNA damage  
356 stimulus”, “DNA repair”, and “DNA damage”. These results support those of Orkin et al. (11),  
357 who also found signatures of selection related to DNA repair and damage in *Cebus imitator*.  
358 Aging is also associated with a decline in mitochondrial function with strong links between  
359 mitochondria and a wide range of processes associated with aging including senescence and  
360 inflammation (44). As discussed in a previous section, there are strong signatures of selection on  
361 mitochondria across cebid branches.

362 Squirrel monkeys are also long-lived primates when considering their small body size—  
363 around 30 years in captivity (47)—and thus selective pressure on longevity may have arisen along  
364 the ancestral Cebidae branch. Indeed, for ancestral Cebidae, we found the enriched disease  
365 annotation “aging” with several genes implicated in age-related neurodegeneration. A particularly  
366 notable gene in this annotation is *WRN* which plays a major role in genome stability with  
367 mutations in *WRN* associated with defective telomere maintenance and causing Werner  
368 syndrome, which is characterised by rapid onset of cellular senescence, early cancer onset, and  
369 premature aging (50). In addition, there are several important genes with signatures of selection  
370 related to sphingolipid and ceramide metabolism for ancestral Cebidae including a ceramide  
371 synthase (*CERS4*), and *SMPDI*, which encodes a lysosomal acid sphingomyelinase (ASM).  
372 Recent studies have highlighted the importance of ASM as a critical mediator for pathologies in  
373 aging and age-related neurodegenerative diseases, with ASM viewed as a promising drug target  
374 for anti-aging and the treatment of age-related neurodegenerative diseases (51). We also find  
375 another important ceramide synthase gene, *CERS*, in the across-capuchin gene set, which  
376 catalyses the synthesis of C18-ceramide in brain neurons, with elevated expression of this gene  
377 associated with increased longevity in humans (52).

378 Humans are particularly susceptible to age-related neurodegenerative disorders such as  
379 Alzheimer’s disease (AD). While non-human primates show some age-related neurodegeneration,  
380 pathological neurodegeneration such as seen in AD is rare (53). Interestingly, we recover many  
381 genes across the capuchin branches associated with age-related neurodegenerative disorders in  
382 humans. This is particularly evident for robust capuchins with various enriched disease  
383 annotations related to AD (also found for squirrel monkeys) and dementia, as well as several  
384 genes directly associated with AD including *APOE*, a major genetic risk factor locus in humans.  
385

386 For ancestral Cebidae, we recovered the important related gene *ADAM10*, an alpha secretase  
387 involved in the cleavage of APP thereby preventing the generation of amyloid beta peptides  
388 associated with the development of AD (54).

389 Notably, there is a strong relationship between circadian rhythms and aging. Emerging in  
390 early infancy, the circadian system undergoes significant changes through an organism's lifespan  
391 affecting rhythms of behaviours, temperature regulation, and hormone release, among others, and  
392 is implicated in human longevity (55). We found signatures of selection on circadian rhythms in  
393 both ancestral Cebinae and across-capuchins represented by enriched BP GO terms and UP  
394 keywords and including genes encoding core components of the circadian clock such as *PER3*.  
395 Precisely timed rhythmic activities that are tuned to periodic biotic and abiotic cycles of an  
396 organism's environment are likely to confer adaptive advantage (56) and these signatures may  
397 relate to a variety of factors including, for example, the high activity levels of capuchins, as well  
398 as capuchin longevity, slow maturation, and/or delayed life history.

### 399 ***Behaviour and cognition***

401 The behavioural diversity characterising capuchin monkeys includes social conventions and local  
402 traditions, complex and intimate social relationships, ecological and dietary flexibility, tool use,  
403 and extractive foraging including an astounding degree of planning, with capuchin behaviour  
404 varying by age, sex, and geographically across populations of the same species (57–60). Crucial  
405 neuromodulators influencing the brain and likely shaping this behavioural variation include the  
406 major neurotransmitter systems, as well as neuropeptides and hormones. Neuromodulators play a  
407 prominent role in nervous system function, from simple reflexes to influencing synaptic plasticity  
408 and neurogenesis, and mediating higher cognitive processes such as sensory processing, memory  
409 encoding, learning, mood, and decision-making, with essential roles in modulating behaviour (61,  
410 62).

411 We recover broad and sweeping signatures of selection on hormones, neuropeptides, and  
412 behaviour for the cebine branches, particularly for ancestral Cebinae and across-capuchins, with  
413 many related enriched terms. Interesting genes found across these annotations include those  
414 encoding neuropeptides and receptors that play important roles in many physiologic processes  
415 including cognition, memory, sensory/pain processing, stress, hormone and insulin secretion,  
416 appetite regulation, metabolism, and energy homeostasis. Several of these genes encode peptides  
417 that play central roles in feeding behaviour including ghrelin and obestatin (*GHRL*), and leptin  
418 (*LEP*), as well as other important neuropeptide related genes (e.g., *NPFF*, *NPFFR1*, *GALR3*, *BSX*,  
419 *GPR39*). Signatures of selection related to other crucial neuromodulators include on three genes  
420 encoding serotonin receptors for the various capuchin branches, and on at least three genes  
421 involved in dopamine signalling for ancestral Cebinae. The ancestral Cebinae gene set is also  
422 enriched for terms related to agmatine biosynthesis (including the gene *AGMAT*); agmatine is  
423 widely and unevenly distributed in the mammalian brain, acting as a neuromodulator that may  
424 directly participate in learning and memory processes, and is sometimes taken orally to treat  
425 depression in humans (63).

426 There are multiple genes in the hormone annotations in the ancestral Cebinae and/or  
427 across-capuchin gene sets related to the thyroid hormone (TH) and thyroid-stimulating hormone  
428 (e.g., *TRH*, *CGA*, *PAX8*). TH is a key metabolic hormone with many physiologic functions  
429 including critical roles in differentiation, growth, and metabolism. TH dramatically impacts  
430 mammalian brain development, with its importance highlighted by the deleterious and irreversible  
431 effects of TH deficiency/dysfunction during foetal and neonatal periods. TH also plays important  
432 roles in normal adult brain function and has a profound influence on behaviour throughout life,  
433 with adult-onset TH dysfunction associated with a range of CNS-related pathologies, neurological  
434 and behavioural abnormalities, and alterations in mood and cognition (64).

435 While capuchins are known for their cognitive and social behaviours, squirrel monkeys  
436 live in extremely large groups and also show differentiated social relationships and prosocial  
437 behaviours that they share with capuchins such as predator mobbing and alarm calls (65, 66). For  
438 ancestral Cebidae, signatures of selection related to neuromodulation are recovered on genes such  
439 as *DBH*, dopamine beta-hydroxylase, which catalyses the conversion of dopamine to  
440 noradrenaline, playing a role in the bioavailability of both crucial neuromodulators, as well as  
441 another serotonin receptor, several neuropeptide receptors, and *RPH3A*. *RPH3A* plays an  
442 important role in neurotransmitter release and is involved in the exocytosis of arginine  
443 vasopressin (AVP), which is notable given AVP mediates complex mammalian social behaviours.  
444 For squirrel monkeys, we recover the enriched BP GO terms “dopamine metabolic process” and  
445 “dopamine biosynthetic process”.

### 446 **Reproduction and mating systems**

447 Platyrrhine primates show a diverse range of mating systems and sexual/reproductive  
448 characteristics and behaviours. Both capuchin and squirrel monkeys are characterised by multi-  
449 male multi-female mating systems (polygynandry), unlike many of their closely related lineages,  
450 for example, the flexible polyandry-monogamy seen in callitrichids and the social monogamy of  
451 owl monkeys. Polygynandrous mating systems are associated with post-copulatory sexual  
452 selection through sperm competition (67). Sperm competition can be directed at the quantity and  
453 quality of sperm, for example, effectuated via changes to rates of spermatogenesis, sperm cell  
454 size, morphology, and mobility, copulation frequency, testes size, and the morphology of the  
455 penis, accessory glands, and ducts (67). In line with the reproductive shift to polygynandry in  
456 ancestral Cebidae, we find strong and sweeping signatures of selection putatively related to sperm  
457 competition in both gene sets with various enriched terms describing motile cilium and flagella,  
458 spermatogenesis, sperm development, male meiosis, fertilisation, and reproduction. These terms  
459 cover a suite of interesting genes including two important members of the CatSper complex, a  
460 sperm-specific ion channel involved in several important steps of fertilisation including sperm  
461 hyperactivation and capacitation, which allow sperm to reach and interact with an oocyte. Similar  
462 signatures can also be found for ancestral Cebinae with “fertilisation” forming the top ranked  
463 individual BP GO term, as well as more broadly on motile cilia. In line with the shift to multi-  
464 male multi-female mating systems, cebid lineages are also characterised by larger group sizes,  
465 which is particularly notable for squirrel monkeys (68), and may underlie some of the enriched  
466 immune system related results recovered for ancestral Cebidae, squirrel monkeys, and ancestral  
467 Cebinae.  
468

469 The behavioural repertoire of capuchins includes new reproductive/courtship behaviours  
470 and complex intimate individual relationships, which may also relate to their mating system (69).  
471 In agreement, we recovered genes related to sex steroids and reproductive hormones/peptides in  
472 the ancestral Cebinae and across-capuchins gene sets, many of which are contained in  
473 aforementioned enriched hormone-related terms discussed in the previous section. For across-  
474 capuchins, we also recovered more specific enriched GO terms describing the secretion of  
475 gonadotropin, luteinising hormone, and endocrine hormones. Several genes in these terms are  
476 involved in sex steroid metabolism, while others are associated with the pituitary glycoprotein  
477 hormones and prolactin such as *PRLH*, prolactin releasing hormone, which stimulates prolactin  
478 release and regulates prolactin expression, as well as lactation, behaviour, and the reproductive  
479 system. Among the most notable genes recovered for capuchins is *NPVF*, found in both the  
480 ancestral Cebinae and across-capuchins branches, encoding the neuropeptides NPSF and NPVF  
481 (also referred to as the RFamide-related peptides, RFRP-1 and RFRP-3), which are mammalian  
482 homologs of the avian neuropeptide gonadotropin-inhibitory hormone. These neuropeptides act as  
483 potent negative regulators of gonadotropin synthesis and secretion, with a range of functions in  
484 the modulation of reproduction including the regulation of sexual behaviour, sexual maturation,

485 ovulatory cycle, gonadal function, reproductive seasonality, and stress-induced reproductive  
486 suppression, among others (70).

### 487 **Body size and morphology**

488 While the two capuchin lineages, robust and gracile, share many traits as discussed throughout,  
489 significant derived characters arose since their divergence 5 to 6 mya, hence their division into  
490 two genera, *Sapajus* and *Cebus* (59, 71). The most notable differences relate to their body shape  
491 and skeletal morphology, and this is reflected in the strongest signatures of selection recovered  
492 individually for both lineages. In line with their name, robust capuchins (*Sapajus*) are generally  
493 stockier and more skeletally robust, with shorter, thicker limbs, as well as striking differences in  
494 cranio-dental morphology particularly relating to the robust masticatory architecture of the skull,  
495 a specialisation to process tougher foods (durophagy) such as encased nuts and palm fruits (59,  
496 72). Further, *Sapajus libidinosus* is known to habitually use stone tools to access a variety of  
497 encased foods including otherwise inaccessible foods, a skill that takes many years to perfect, and  
498 this ability likely relates to their more robust skeletal morphology (71, 73). This derived  
499 morphology is reflected in the range of enriched GO terms and candidate genes we found in this  
500 lineage related to facial, skeletal system, and skeletal muscle tissue morphogenesis and  
501 development, as well as BMP signalling pathway. Several genes in these terms are explicitly  
502 associated with skull bone fusion and morphology such as *SIX4*, which plays an important role in  
503 cranial morphogenesis and synchondrosis formation during embryonic development (74).  
504 Another is *RAB23*, which functions in limb patterning, coordinating early osteogenesis, and  
505 controlling the growth and fusion of developing skull bones, and is implicated in the premature  
506 fusion of craniofacial sutures seen in Carpenter syndrome (75). A third interesting gene in these  
507 annotations encodes the protein delangin (*NIPBL*) that plays a role in the development of the  
508 limbs and skull/face bones; defects in this gene are the primary cause of Cornelia de Lange  
509 syndrome, which is characterised by distinctive facial features, limb/skeletal dysmorphology, and  
510 slow postnatal growth (76).

511 Similarly, for gracile capuchins (*Cebus*)—characterised by long slender limbs and a  
512 slighter body plan (59, 77)—we recovered various enriched annotated terms related to limb and  
513 skeletal system development, including several homeobox transcription factors of the Hox (5 of  
514 21 analysed) and Shox (1 of 2 analysed) families that play fundamental roles in embryonic pattern  
515 formation, axis control, and are required for normal limb development (78). Many other genes in  
516 these terms are also associated with various skeletal dysmorphologies and congenital limb defects  
517 in humans. More broadly, there are signatures of selection on embryonic development for gracile  
518 capuchins including enriched terms such as the GO term “chordate embryonic development” and  
519 UP keyword “developmental protein”. Taken together, the results for robust and gracile capuchins  
520 are suggestive of adaptive pressure on developmental pathways related to the skull/face, limbs,  
521 and skeletal system that may underlie the morphological differences between these capuchin  
522 lineages.

523 Also related to morphology, we recover enriched the GO term “embryonic digit  
524 morphogenesis” for ancestral Cebinae. Capuchins have a high degree of manual dexterity,  
525 possessing pseudo-opposable thumbs augmenting their precision grip ability, which plays a role  
526 in their sensorimotor intelligence, and show increased dexterity compared to squirrel monkeys  
527 (79, 80).

528 Among the most unusual aspects of squirrel monkey biology is their large brain size in the  
529 context of their overall small body size, which distinguishes them from the other most  
530 encephalised primate lineages. Reconstructions have indicated that squirrel monkey body size  
531 decreased and their brain size increased further after squirrel monkeys and capuchins diverged  
532 (7). Our results for squirrel monkeys reveal broad signatures related to growth factors across our  
533 analyses with enriched growth factor related GO terms and genes encoding or associated with  
534 members of the fibroblast growth factor and transforming growth factor beta families, and many  
535



536 implicated in human stature and dwarfism including the short stature homeobox gene (*SHOX*).  
537 The most significant selective signatures for squirrel monkeys relate to cellular signalling  
538 cascades with various enriched annotations describing the mitogen-activated protein kinase  
539 (MAPK) and ERK1/2 signalling pathways involved in basic cellular processes including cell  
540 proliferation and differentiation. Together, the signatures of selection on ERK/MAPK cascades  
541 and growth factors may be related to the reduced body size of squirrel monkeys, and/or the  
542 adaptive maintenance of a large brain size while reducing body size.

#### 543 544 ***Diet and nutrition***

545 Capuchins inhabit a complex omnivorous dietary niche characterised by dietary flexibility, high  
546 nutrient density, and easy digestibility for their small gut (81), with high sensorimotor intelligence  
547 related to their extractive foraging capabilities. For across-capuchins, we recovered various  
548 diet/metabolism related signatures including for branched chain amino acids (BCAAs), essential  
549 amino acids required in the diet that are major constituents of muscle protein; riboflavin, a B  
550 vitamin involved in many physiologic processes, necessary for normal cell growth and function;  
551 and biotin, another essential B vitamin involved in the conversion of food to energy, and  
552 important for embryonic growth. It is notable that all of these nutrients are found in lipid- and  
553 protein-rich food sources such as meats, eggs, and nuts. Among the capuchin lineages, robust  
554 capuchins show a preference for food with a high lipid content such as nuts and insects (82), and  
555 we recover various enriched GO terms related to lipid metabolism, which may be linked to their  
556 increased ability (versus gracile capuchins) to access fat-rich nuts as a result of both their robust  
557 skeletal morphology and, in some species, their stone tool use. Robust capuchins also show  
558 various signatures potentially related to water homeostasis including enriched GO terms for  
559 kidney/renal system development and sodium ion transport. Selective pressure on water  
560 homeostasis may relate to range expansion into drier habitats such as the Cerrado for some  
561 *Sapajus* lineages in the Pleistocene (83).

562 Similarly, in the highly insectivorous squirrel monkeys (9), we recovered various enriched  
563 terms related to nutrition including mineral absorption, response to metal ions, retinoid  
564 metabolism, and calcium homeostasis, which is notable given many insects are considered a poor  
565 source of calcium.

#### 566 567 ***Limitations and future directions***

568 While a single genome per species or lineage can give insight into evolutionary processes deep in  
569 time, the sequencing of more individuals in each of these lineages will be critical for studying  
570 patterns of demography and selection in more recent history. The inclusion of additional  
571 individuals is also required to determine if variants discovered in this study are fixed or vary  
572 within species. Moreover, without functional genomic experiments, some of the significant genes  
573 described in this study might reflect the relaxation of selection rather than adaptive evolution, and  
574 these genes thus remain candidates until they are validated. Furthermore, given protein function,  
575 which is generally derived from humans, mice, and other model organisms, is little understood in  
576 the context of the biology of these cebid lineages, the functional significance of selection on these  
577 candidate genes and the association of these signals with specific adaptive functions is correlative.  
578 Codon-based models of evolution are also unable to consider variation in regulatory controls and  
579 gene expression, which can both also have important adaptive implications.

580 The new draft reference assembly, short read data, and RNAseq data from 17 tissues for  
581 the same robust capuchin individual provide a useful resource for future genomics studies of  
582 capuchins and primates more broadly. Future directions might include long read sequencing, a  
583 candidate technology to fill gaps in the assembly and increase the contiguity to chromosome  
584 scale. The results from this study will be useful in downstream applications for the study of genes  
585 of interest in both captive and field studies of platyrrhines, as well as opening new avenues of  
586 research for the study of primate brain evolution and comparative brain biology.

587

## 588 **Materials and Methods**

### 589 **Genome sequencing, assembly & size estimation**

590 Whole blood was collected during a routine physical from Mango, a female captive brown robust  
591 capuchin (*Sapajus apella*) housed at the Language Research Center, Georgia State University  
592 (IACUC number: A16031). Mango was aged and thought to have been wild-caught in the 1970s,  
593 she was the last remaining individual from the colony's original source population. Dovetail  
594 Genomics extracted high molecular weight DNA from the blood sample to construct one shotgun  
595 library and three "Chicago" proximity ligation libraries with chimeric pairs spanning up to 50 Kbp  
596 in physical distance. The shotgun library was sequenced across four HiSeq 4000 lanes producing  
597 1.33 billion 150 bp paired end (PE) read pairs (399 Gbp), an estimated 148-fold sequencing  
598 coverage (based on a genome size of 2.7 Gbp). The three Chicago libraries were pooled and  
599 sequenced across two HiSeq 4000 lanes generating 800 million 100 bp PE read pairs with ~220-  
600 fold physical coverage. All sequencing was performed at the DNA Technologies Core, UC Davis.  
601 All raw reads were deposited on NCBI's sequence read archive (SRA) (Table S1). A preliminary  
602 *de novo* assembly was generated by Dovetail Genomics from quality-filtered short read shotgun  
603 data using the Meraculous assembler (84). The final draft assembly was generated by scaffolding  
604 the preliminary assembly with the Chicago libraries using Dovetail's HiRise pipeline (13). Total  
605 length of this genome assembly was 2,520.3 Mbp (in 6631 scaffolds) with an N50 of 27.1 Mbp (29  
606 scaffolds) and N90 of 4.04 Mbp (116 scaffolds). The longest scaffold was 90.4 Mbp.

607 We evaluated completeness of the genome assembly by its estimated gene content using  
608 CEGMA v2.5 (15) and BUSCO v3.0.2 (14) to calculate the proportion of 248 CEGs or 6,192  
609 Euarchontoglires-specific conserved single copy orthologs, respectively, that were either complete,  
610 fragmented, or missing. Using quality-filtered, nuclear only, endogenous short reads, we also  
611 performed *k*-mer counting with Jellyfish v.2.2.6 (85) to generate a *k*-mer frequency distribution of  
612 31-mers and then estimated genome size using four approaches. We generated an initial  
613 mitochondrial genome assembly for Mango by mapping a set of putative mitochondrial short read  
614 pairs to a complete *S. apella* mitochondrial genome using MIRA v.4.0.2 (86), and then performing  
615 baiting and iterative mapping with a MITObim v.1.9.1 (87) wrapper script to generate the final  
616 mitochondrial genome assembly.

617

### 618 **RNA sequencing & transcript assemblies**

619 The reference individual, Mango, was euthanised in the months after genome sequencing when a  
620 cancerous tumour was discovered, allowing the ethical collection of fresh tissue for RNA  
621 sequencing from the same individual. Tissue collection was performed during necropsy at Yerkes  
622 National Primate Research Center within hours of her death. Seventeen tissues samples were  
623 harvested and placed in RNAlater (Invitrogen), and subsequently, total RNA was isolated from  
624 each sample followed by poly-A tail selection library preparation. The libraries were pooled and  
625 sequenced on a single HiSeq 3000 lane generating ~367 million 150 bp PE read pairs (102.5 Gbp)  
626 with between 16.8 and 27.4 million reads pairs per tissue. These steps were performed by the  
627 Technology Center for Genomics & Bioinformatics (TCGB) at UCLA. All raw reads were  
628 deposited on NCBI's SRA (Table S1). After *k*-mer correction, filtering, trimming, and rRNA  
629 removal steps, we generated seven transcript assemblies with the cleaned RNAseq read pairs, as  
630 follows: *de novo* (TrinDNv2); abundance filtered *de novo* (TrinDNv2); reference-based (Cuffv1);  
631 PASA with TrinDNv2 and Cuffv1 as input (PASAv1); genome-guided (TrinGGv1); PASA with  
632 TrinDNv2, Cuffv1, and TrinGGv1 as input (PASAv2); and non-redundant with PASAv2 as input  
633 (NRv1). This ultimately resulted in three assemblies (TrinDNv2, PASAv1, and NRv1) for use as  
634 direct evidence in various iterations of the genome annotation pipeline. We checked quality metrics  
635 and completeness of the seven assemblies using rnaQUAST v1.5.0 (17) with BUSCO v3.0.2 in  
636 transcriptome mode using the Euarchontoglires-specific BUSCOs gene set.

637

### 638 ***Repeat & genome annotation***

639 To assess the repeat content of the robust capuchin genome, we first performed a homology-based  
640 repeat annotation of our genome assembly using known elements with RepeatMasker v4.0.7 (88),  
641 followed by *de novo* repeat identification using the library of unknown repeats generated with  
642 RepeatModeler v1.0.11 (89), and finally, we used ProcessRepeats from RepeatMasker to  
643 summarise all annotated repeats in the genome assembly. We annotated the robust capuchin  
644 genome assembly in three iterations of Maker v3.01.02 (18, 19) to predict gene models,  
645 incorporating direct evidence from transcript assemblies, homology to the predicted proteomes of  
646 platyrrhine primates and humans, and *ab initio* predictions from Augustus v3.3 (90) with a robust  
647 capuchin-specific HMM that was trained initially in BUSCO and twice subsequently using high-  
648 quality gene models from each of the first two passes of Maker (Table S6). Predicted gene models  
649 from the third pass of Maker were functionally annotated using Blast2GO v5.2.5 (91) and filtered  
650 based on supporting evidence and presence of annotations.

651

### 652 ***Identification of orthologs, alignment & filtering***

653 In order to assess signatures of positive selection in other platyrrhine primate genomes, we first  
654 identified orthologs using the OrthoMCL pipeline (92) across ten species; four platyrrhine primates  
655 (*Sapajus*; *Cebus*; *Saimiri*; *Callithrix*), five other primates (*Macaca*, *Pan*, *Homo*, *Carlito*,  
656 *Microcebus*), and mouse (*Mus*). As input to the pipeline, we used predicted CDS and protein  
657 sequence files from Ensembl (or for *Sapajus* from our genome annotation) for all species that were  
658 filtered for the longest isoform per gene. We generated a set of 9,216 conservative, manually-  
659 curated CDS alignments which were highly likely to represent one-to-one orthologs across their  
660 length by: (i) filtering the OrthoMCL output for one-to-one orthologs, a minimum of five species,  
661 and the presence of at least one capuchin lineage; (ii) aligning CDS sequences for these filtered  
662 orthologs groups by codon using Guidance2 v.2.02 (20) with the MAFFT aligner v.7.419 (93) with  
663 100 guidance bootstraps; and (iii) visually inspecting all alignments for errors and editing as  
664 required to reduce the likelihood of false positives.

665

### 666 ***Branch model & branch-site model tests***

667 We specified six lineages (foreground branches) for the positive selection tests, as follows: (H1)  
668 robust capuchin (*Sapajus*); (H2) gracile capuchin (*Cebus*); (H3) ancestral Cebinae (capuchins);  
669 (H3a) across-capuchins more generally (all Cebinae); (H4) ancestral Cebidae; and (H5) squirrel  
670 monkey (*Saimiri*). We assigned species set IDs to each combination of species (207 species sets)  
671 found in the final alignments and generated unrooted tree files that specified the various foreground  
672 branches analysed for each species set (759 tree files). We ran two different tests for positive  
673 selection with codeml from the PAML package v.4.9 (21) which are based on rates of non-  
674 synonymous versus synonymous substitutions ( $\omega$  or dN/dS ratio): the branch-site model (BSM),  
675 which tests for episodic selection by searching for positively selected sites in the foreground branch;  
676 and (B) the branch model (BM), which tests for elevated dN/dS ratios along the foreground branch  
677 indicating accelerated evolution. We did not run the BSM test for H3a, thus a total of 11 lineage  
678 and test combinations were conducted with codeml. For each BM test, we assessed two models as  
679 follows; the alternative branch model which separates the tree into foreground and background  
680 branches that have distinct  $\omega$  parameters allowing them to evolve with separate dN/dS ratios, and  
681 the null model which uses a single  $\omega$  parameter across the tree. For each BSM test, we assessed an  
682 alternative branch-site model allowing for positive selection on the foreground branch and a null  
683 model allowing only for purifying and neutral selection on the foreground and background lineages.  
684 After estimating parameters and calculating the likelihood with codeml, we performed likelihood  
685 ratio tests (LRTs) by comparing the likelihood of the alignment under the alternative versus under  
686 the null model, and calculated p-values from the chi-square distribution with one degree of freedom.

687 We conducted 11 gene set enrichment analyses, one for the set of significant genes from  
688 each combination of lineage and test (BM or BSM) using DAVID v.6.8 (22) with the entire human  
689 gene set as the background population of genes. In DAVID, we assessed lists/charts of enriched (i)  
690 BP, CC, and MF GO terms (the “all” option), (ii) UP keywords, (iii) KEGG pathways, (iv)  
691 Reactome pathways, and (v) disease annotations, as well as functional annotation clustering across  
692 the three GO terms together under the high classification stringency criteria, with an EASE score  
693 of < 0.05 required for all enriched annotated terms for both approaches.

## 694 **References**

- 696 1. P. Perelman, W. E. Johnson, C. Roos, H. N. Seuánez, J. E. Horvath, M. a M. Moreira, B.  
697 Kessing, J. Pontius, M. E. Roelke, Y. Rumpler, M. P. C. Schneider, A. Silva, S. J. O’Brien,  
698 J. Pecon-Slattey, A molecular phylogeny of living primates. *PLoS Genet.* **7**, e1001342  
700 (2011).
- 701 2. M. Bond, M. F. Tejedor, K. E. Campbell, L. Chornogubsky, N. Novo, F. Goin, Eocene  
702 primates of South America and the African origins of New World monkeys. *Nature.* **520**,  
703 538–541 (2015).
- 704 3. J. Cracraft, C. C. Ribas, F. M. D’Horta, J. Bates, R. P. Almeida, A. Aleixo, J. P. Boubli, K.  
705 E. Campbell, F. W. Cruz, M. Ferreira, S. C. Fritz, C. H. Grohmann, E. M. Latrubesse, L. G.  
706 Lohmann, L. J. Musher, A. Nogueira, A. O. Sawakuchi, P. Baker, “The origin and  
707 evolution of Amazonian species diversity” in *Neotropical Diversification: Patterns and*  
708 *Processes*, V. Rull, A. Carnaval, Eds. (Springer, Heidelberg, 2020), pp. 225–244.
- 709 4. N. M. Jameson Kiesling, S. V Yi, K. Xu, F. Gianluca Sperone, D. E. Wildman, The tempo  
710 and mode of New World monkey evolution and biogeography in the context of  
711 phylogenomic analysis. *Mol. Phylogenet. Evol.* **82 Pt B**, 386–99 (2015).
- 712 5. A. Estrada, P. A. Garber, A. B. Rylands, C. Roos, E. Fernandez-Duque, A. Di Fiore, K.  
713 Anne-Isola Nekaris, V. Nijman, E. W. Heymann, J. E. Lambert, F. Rovero, C. Barelli, J.  
714 M. Setchell, T. R. Gillespie, R. A. Mittermeier, L. V. Arregoitia, M. de Guinea, S.  
715 Gouveia, R. Dobrovolski, S. Shanee, N. Shanee, S. A. Boyle, A. Fuentes, K. C.  
716 MacKinnon, K. R. Amato, A. L. S. Meyer, S. Wich, R. W. Sussman, R. Pan, I. Kone, B.  
717 Li, Impending extinction crisis of the world’s primates: Why primates matter. *Sci. Adv.* **3**  
718 (2017), doi:10.1126/sciadv.1600946.
- 719 6. A. Rylands, R. A. Mittermeier, “Family Cebidae (capuchins and squirrel monkeys)” in  
720 *Handbook of the mammals of the world. Volume 3*, R. Mittermeier, A. B. Rylands, D. E.  
721 Wilson, Eds. (Lynx Edicions, Barcelona, 2013), pp. 348–389.
- 722 7. S. H. Montgomery, I. Capellini, R. A. Barton, N. I. Mundy, Reconstructing the ups and  
723 downs of primate brain evolution: implications for adaptive hypotheses and *Homo*  
724 *floresiensis*. *BMC Biol.* **8**, 1–19 (2010).
- 725 8. D. M. Fragaszy, E. Visalberghi, L. M. Fedigan, Eds., *The complete capuchin: the biology*  
726 *of the genus Cebus* (Cambridge University Press, Cambridge, 2004).
- 727 9. H. S. Zimble-Delorenzo, A. I. Stone, Integration of field and captive studies for  
728 understanding the behavioral ecology of the squirrel monkey (*Saimiri* sp.). *Am. J. Primatol.*  
729 **73**, 607–622 (2011).
- 730 10. S. D. Tardif, C. R. Abee, K. G. Mansfield, Workshop summary: Neotropical primates in  
731 biomedical research. *ILAR J.* **52**, 386–392 (2011).
- 732 11. J. D. Orkin, M. J. Montague, D. Tejada-Martinez, M. de Manuel, J. del Campo, S. C.  
733 Hernandez, A. Di Fiore, C. Fontseré, J. A. Hodgson, M. C. Janiak, L. F. K. Kuderna, E.  
734 Lizano, M. P. Martin, Y. Niimura, G. H. Perry, C. S. Valverde, J. Tang, W. C. Warren, J.  
735 P. de Magalhães, S. Kawamura, T. Marquès-Bonet, R. Krawetz, A. D. Melin, The  
736 genomics of ecological flexibility, large brains, and long lives in capuchin monkeys



- 737 revealed with fecalFACS. *Proc. Natl. Acad. Sci. U. S. A.* **118** (2021),  
738 doi:10.1073/pnas.2010632118.
- 739 12. A. M. Boddy, P. W. Harrison, S. H. Montgomery, J. A. Caravas, M. A. Raghanti, K. A.  
740 Phillips, N. I. Mundy, D. E. Wildman, Evidence of a conserved molecular response to  
741 selection for increased brain size in primates. *Genome Biol. Evol.* **9**, 700–713 (2017).
- 742 13. N. H. Putnam, B. O. Connell, J. C. Stites, B. J. Rice, P. D. Hartley, C. W. Sugnet, D.  
743 Haussler, D. S. Rokhsar, Chromosome-scale shotgun assembly using an in vitro method for  
744 long-range linkage. *Genome Res.* **26**, 342–350 (2016).
- 745 14. F. A. Simão, R. M. Waterhouse, P. Ioannidis, E. V. Kriventseva, E. M. Zdobnov, BUSCO:  
746 Assessing genome assembly and annotation completeness with single-copy orthologs.  
747 *Bioinformatics.* **31**, 3210–3212 (2015).
- 748 15. G. Parra, K. Bradnam, I. Korf, CEGMA: A pipeline to accurately annotate core genes in  
749 eukaryotic genomes. *Bioinformatics.* **23**, 1061–1067 (2007).
- 750 16. L. Fantini, M. D. Mudry, M. Nieves, Genome size of two *Cebus* species (Primates:  
751 Platyrrhini) with a fertile hybrid and their quantitative genomic differences. *Cytogenet.*  
752 *Genome Res.* **135**, 33–41 (2011).
- 753 17. E. Bushmanova, D. Antipov, A. Lapidus, V. Suvorov, A. D. Prjibelski, RnaQUAST: A  
754 quality assessment tool for *de novo* transcriptome assemblies. *Bioinformatics.* **32**, 2210–  
755 2212 (2016).
- 756 18. C. Holt, M. Yandell, MAKER2: An annotation pipeline and genome-database management  
757 tool for second-generation genome projects. *BMC Bioinformatics.* **12** (2011),  
758 doi:10.1186/1471-2105-12-491.
- 759 19. M. S. Campbell, M. Y. Law, C. Holt, J. C. Stein, G. D. Moghe, D. E. Hufnagel, J. Lei, R.  
760 Achawanantakun, D. Jiao, C. J. Lawrence, D. Ware, S. H. Shiu, K. L. Childs, Y. Sun, N.  
761 Jiang, M. Yandell, MAKER-P: A Tool kit for the rapid creation, management, and quality  
762 control of plant genome annotations. *Plant Physiol.* **164**, 513–524 (2014).
- 763 20. I. Sela, H. Ashkenazy, K. Katoh, T. Pupko, GUIDANCE2: Accurate detection of unreliable  
764 alignment regions accounting for the uncertainty of multiple parameters. *Nucleic Acids*  
765 *Res.* **43**, W7–W14 (2015).
- 766 21. Z. Yang, PAML 4: Phylogenetic analysis by maximum likelihood. *Mol. Biol. Evol.* **24**,  
767 1586–1591 (2007).
- 768 22. D. W. Huang, B. T. Sherman, R. A. Lempicki, Systematic and integrative analysis of large  
769 gene lists using DAVID bioinformatics resources. *Nat. Protoc.* **4**, 44–57 (2009).
- 770 23. H. J. Jerison, Animal intelligence as encephalization. *Philos. Trans. R. Soc. Lond. B. Biol.*  
771 *Sci.* **308**, 21–35 (1985).
- 772 24. A. M. Boddy, M. R. McGowen, C. C. Sherwood, L. I. Grossman, M. Goodman, D. E.  
773 Wildman, Comparative analysis of encephalization in mammals reveals relaxed constraints  
774 on anthropoid primate and cetacean brain scaling. *J. Evol. Biol.* **25**, 981–994 (2012).
- 775 25. K. L. Chiou, L. Pozzi, J. W. Lynch Alfaro, A. Di Fiore, Pleistocene diversification of living  
776 squirrel monkeys (*Saimiri* spp.) inferred from complete mitochondrial genome sequences.  
777 *Mol. Phylogenet. Evol.* **59**, 736–745 (2011).
- 778 26. M. Igarashi, Molecular basis of the functions of the mammalian neuronal growth cone  
779 revealed using new methods. *Proc. Japan Acad. Ser. B Phys. Biol. Sci.* **95**, 358–377  
780 (2019).
- 781 27. J. Guo, J. M. Otis, S. K. Suci, C. Catalano, L. Xing, S. Constable, D. Wachten, S. Gupton,  
782 J. Lee, A. Lee, K. H. Blackley, T. Ptacek, J. M. Simon, S. Schurmans, G. D. Stuber, T.  
783 Caspary, E. S. Anton, Primary cilia signaling promotes axonal tract development and is  
784 disrupted in Joubert syndrome-related disorders models. *Dev. Cell.* **51**, 759–774.e5 (2019).
- 785 28. S. M. Park, H. J. Jang, J. H. Lee, Roles of primary cilia in the developing brain. *Front.*  
786 *Cell. Neurosci.* **13**, 1–10 (2019).

- 787 29. Y. Q. Wang, Y. P. Qian, S. Yang, H. Shi, C. H. Liao, H. K. Zheng, J. Wang, A. A. Lin, L.  
788 L. Cavalli-Sforza, P. A. Underhill, R. Chakraborty, L. Jin, B. Su, Accelerated evolution of  
789 the pituitary adenylate cyclase-activating polypeptide precursor gene during human origin.  
790 *Genetics*. **170**, 801–806 (2005).
- 791 30. H. Stephan, G. Baron, H. D. Frahm, Comparative size of brains and brain structures. *Comp.*  
792 *primate Biol.* **4**, 1–38 (1988).
- 793 31. J. D. Sweatt, Neural plasticity and behavior – sixty years of conceptual advances. *J.*  
794 *Neurochem.* **139**, 179–199 (2016).
- 795 32. J. W. Fawcett, T. Oohashi, T. Pizzorusso, The roles of perineuronal nets and the perinodal  
796 extracellular matrix in neuronal function. *Nat. Rev. Neurosci.* **20**, 451–465 (2019).
- 797 33. A. C. Reichelt, D. J. Hare, T. J. Bussey, L. M. Saksida, Perineuronal Nets: Plasticity,  
798 Protection, and Therapeutic Potential. *Trends Neurosci.* **42**, 458–470 (2019).
- 799 34. M. Shimojo, J. Madara, S. Pankow, X. Liu, J. Yates, T. C. Südhof, A. Maximov,  
800 Synaptotagmin-11 mediates a vesicle trafficking pathway that is essential for development  
801 and synaptic plasticity. *Genes Dev.* **33**, 365–376 (2019).
- 802 35. M. A. Lancaster, D. J. Gopal, J. Kim, S. N. Saleem, J. L. Silhavy, C. M. Louie, B. E.  
803 Thacker, Y. Williams, M. S. Zaki, J. G. Gleeson, Defective Wnt-dependent cerebellar  
804 midline fusion in a mouse model of Joubert syndrome. *Nat. Med.* **17**, 726–731 (2011).
- 805 36. R. J. Ferland, W. Eyaid, R. V. Collura, L. D. Tully, R. S. Hill, D. Al-Nouri, A. Al-  
806 Rumayyan, M. Topcu, G. Gascon, A. Bodell, Y. Y. Shugart, M. Ruvolo, C. A. Walsh,  
807 Abnormal cerebellar development and axonal decussation due to mutations in AHI1 in  
808 Joubert syndrome. *Nat. Genet.* **36**, 1008–1013 (2004).
- 809 37. J. W. Mink, R. J. Blumenshine, D. B. Adams, Ratio of central nervous system to body  
810 metabolism in vertebrates: Its constancy and functional basis. *Am. J. Physiol. - Regul.*  
811 *Integr. Comp. Physiol.* **10**, 203–212 (1981).
- 812 38. M. Rango, N. Bresolin, Brain mitochondria, aging, and Parkinson’s disease. *Genes (Basel).*  
813 **9** (2018), doi:10.3390/genes9050250.
- 814 39. J. W. Doan, T. R. Schmidt, D. E. Wildman, M. Uddin, A. Goldberg, M. Hüttemann, M.  
815 Goodman, M. L. Weiss, L. I. Grossman, Coadaptive evolution in cytochrome c oxidase: 9  
816 of 13 subunits show accelerated rates of nonsynonymous substitution in anthropoid  
817 primates. *Mol. Phylogenet. Evol.* **33**, 944–950 (2004).
- 818 40. L. I. Grossman, D. E. Wildman, T. R. Schmidt, M. Goodman, Accelerated evolution of the  
819 electron transport chain in anthropoid primates. *Trends Genet.* **20**, 578–585 (2004).
- 820 41. M. Goodman, K. N. Sterner, M. Islam, M. Uddin, C. C. Sherwood, P. R. Hof, Z. C. Hou, L.  
821 Lipovich, H. Jia, L. I. Grossman, D. E. Wildman, Phylogenomic analyses reveal  
822 convergent patterns of adaptive evolution in elephant and human ancestries. *Proc. Natl.*  
823 *Acad. Sci. U. S. A.* **106**, 20824–20829 (2009).
- 824 42. Y. Y. Shen, L. Liang, Z. H. Zhu, W. P. Zhou, D. M. Irwin, Y. P. Zhang, Adaptive  
825 evolution of energy metabolism genes and the origin of flight in bats. *Proc. Natl. Acad. Sci.*  
826 *U. S. A.* **107**, 8666–8671 (2010).
- 827 43. A. Cheng, Y. Hou, M. P. Mattson, Mitochondria and neuroplasticity. *ASN Neuro.* **2**, 243–  
828 256 (2010).
- 829 44. N. Sun, R. J. Youle, T. Finkel, The mitochondrial basis of aging. *Mol. Cell.* **61**, 654–666  
830 (2016).
- 831 45. J. M. Allman, T. McLaughlin, A. Hakeem, Brain structures and life-span in primate  
832 species. *Proc. Natl. Acad. Sci. U. S. A.* **90**, 3559–3563 (1993).
- 833 46. C. González-Lagos, D. Sol, S. M. Reader, Large-brained mammals live longer. *J. Evol.*  
834 *Biol.* **23**, 1064–1074 (2010).
- 835 47. C. P. van Schaik, K. Isler, “Life history evolution in primates” in *The evolution of primate*  
836 *societies*, J. C. Mitani, J. Call, P. M. Kappeler, R. A. Palombit, J. B. Silk, Eds. (University

- 837 of Chicago Press, Chicago, 2012), pp. 220–244.
- 838 48. A. M. Bronikowski, M. Cords, S. C. Alberts, J. Altmann, D. K. Brockman, L. M. Fedigan,  
839 A. Pusey, T. Stoinski, K. B. Strier, W. F. Morris, Female and male life tables for seven  
840 wild primate species. *Sci. Data*. **3**, 1–8 (2016).
- 841 49. M. Yousefzadeh, C. Henpita, R. Vyas, C. Soto-Palma, P. Robbins, L. Niedernhofer, Dna  
842 damage—how and why we age? *Elife*. **10**, 1–17 (2021).
- 843 50. A. S. Multani, S. Chang, WRN at telomeres: Implications for aging and cancer. *J. Cell Sci.*  
844 **120**, 713–721 (2007).
- 845 51. M. H. Park, H. K. Jin, J. Bae, Potential therapeutic target for aging and age-related  
846 neurodegenerative diseases: the role of acid sphingomyelinase. *Exp. Mol. Med.* **52**, 380–  
847 389 (2020).
- 848 52. S. M. Jazwinski, S. Kim, J. Dai, L. Li, X. Bi, J. C. Jiang, J. Arnold, M. A. Batzer, J. A.  
849 Walker, D. A. Welsh, C. M. Lefante, J. Volaufova, L. Myers, L. J. Su, D. B. Hausman, M.  
850 V. Miceli, E. Ravussin, L. W. Poon, K. E. Cherry, M. A. Welsch, HRAS1 and LASS1 with  
851 APOE are associated with human longevity and healthy aging. *Aging Cell*. **9**, 698–708  
852 (2010).
- 853 53. A. Von Gunten, M. therese Clerc, R. Tomar, P. S. John Smith, Evolutionary considerations  
854 on aging and Alzheimer’s disease. *J. Alzheimer’s Dis. Park.* **08**, 1–12 (2018).
- 855 54. S. Lammich, E. Kojro, R. Postina, S. Gilbert, R. Pfeiffer, M. Jasionowski, C. Haass, F.  
856 Fahrenholz, Constitutive and regulated  $\alpha$ -secretase cleavage of Alzheimer’s amyloid  
857 precursor protein by a disintegrin metalloprotease. *Proc. Natl. Acad. Sci. U. S. A.* **96**, 3922–  
858 3927 (1999).
- 859 55. O. Froy, Circadian rhythms, aging, and life span in mammals. *Physiology*. **26**, 225–235  
860 (2011).
- 861 56. D. A. Paranjpe, V. K. Sharma, Evolution of temporal order in living organisms. *J.*  
862 *Circadian Rhythms*. **3**, 1–13 (2005).
- 863 57. E. B. Ottoni, P. Izar, Capuchin monkey tool use: Overview and implications. *Evol.*  
864 *Anthropol.* **17**, 171–178 (2008).
- 865 58. S. Perry, Social traditions and social learning in capuchin monkeys (*Cebus*). *Philos. Trans.*  
866 *R. Soc. B Biol. Sci.* **366**, 988–996 (2011).
- 867 59. J. W. Lynch Alfaro, J. de S. E. Silva-Jr, A. B. Rylands, How different are robust and  
868 gracile capuchin monkeys? An argument for the use of *Sapajus* and *Cebus*. *Am. J.*  
869 *Primatol.* **74**, 273–286 (2012).
- 870 60. S. Perry, Behavioural variation and learning across the lifespan in wild white-faced  
871 capuchin monkeys. *Philos. Trans. R. Soc. B Biol. Sci.* **375** (2020),  
872 doi:10.1098/rstb.2019.0494.
- 873 61. B. Beck, G. Pourié, Ghrelin, neuropeptide Y, and other feeding-regulatory peptides active  
874 in the hippocampus: Role in learning and memory. *Nutr. Rev.* **71**, 541–561 (2013).
- 875 62. A. H. Bazzari, H. R. Parri, Neuromodulators and long-term synaptic plasticity in learning  
876 and memory: A steered-glutamatergic perspective. *Brain Sci.* **9** (2019),  
877 doi:10.3390/brainsci9110300.
- 878 63. D. H. Bergin, Y. Jing, G. Williams, B. G. Mockett, H. Zhang, W. C. Abraham, P. Liu,  
879 Safety and neurochemical profiles of acute and sub-chronic oral treatment with agmatine  
880 sulfate. *Sci. Rep.* **9**, 1–13 (2019).
- 881 64. J. W. Smith, A. T. Evans, B. Costall, J. W. Smythe, Thyroid hormones, brain function and  
882 cognition: A brief review. *Neurosci. Biobehav. Rev.* **26**, 45–60 (2002).
- 883 65. S. Boinski, K. Sughrue, L. Selvaggi, R. Quatrone, M. Henry, S. Cropp, An expanded test of  
884 the ecological model of primate social evolution: competitive regimes and female bonding  
885 in three species of squirrel monkeys (*Saimiri oerstedii*, *S. boliviensis*, and *S. sciureus*).  
886 *Behaviour*. **139**, 227–261 (2002).

- 887 66. J. L. Frechette, K. E. Sieving, S. Boinski, Social and personal information use by squirrel  
888 monkeys in assessing predation risk. *Am. J. Primatol.* **76**, 956–966 (2014).
- 889 67. A. F. Dixson, Copulatory and postcopulatory sexual selection in primates. *Folia Primatol.*  
890 **89**, 258–286 (2018).
- 891 68. T. Pinheiro, S. F. Ferrari, M. A. Lopes, Activity budget, diet, and use of space by two  
892 groups of squirrel monkeys (*Saimiri sciureus*) in eastern Amazonia. *Primates.* **54**, 301–308  
893 (2013).
- 894 69. P. Izar, A. Stone, S. Carnegie, E. S. Nakai, “Sexual selection, female choice and mating  
895 systems” in *South American Primates: Comparative Perspectives in the Study of Behavior,*  
896 *Ecology, and Conservation*, A. P. Garber, A. Estrada, J. C. Bicca-Marques, E. W.  
897 Heymann, K. B. Strier, Eds. (Springer, New York, 2009), pp. 157–189.
- 898 70. T. Ubuka, K. Tsutsui, Reproductive neuroendocrinology of mammalian gonadotropin-  
899 inhibitory hormone. *Reprod. Med. Biol.* **18**, 225–233 (2019).
- 900 71. K. A. Wright, B. W. Wright, S. M. Ford, D. Fragaszy, P. Izar, M. Norconk, T. Masterson,  
901 D. G. Hobbs, M. E. Alfaro, J. W. Lynch Alfaro, The effects of ecology and evolutionary  
902 history on robust capuchin morphological diversity. *Mol. Phylogenet. Evol.* **82**, 455–466  
903 (2015).
- 904 72. T. J. Masterson, Sexual dimorphism and interspecific cranial form in two capuchin species:  
905 *Cebus albifrons* and *C. apella*. *Am. J. Phys. Anthropol.* **104**, 487–511 (1997).
- 906 73. Y. Eshchar, P. Izar, E. Visalberghi, B. Resende, D. Fragaszy, When and where to practice:  
907 social influences on the development of nut-cracking in bearded capuchins (*Sapajus*  
908 *libidinosus*). *Anim. Cogn.* **19**, 605–618 (2016).
- 909 74. N. Funato, New insights into cranial synchondrosis development: a mini review. *Front.*  
910 *Cell Dev. Biol.* **8**, 1–9 (2020).
- 911 75. M. R. Hasan, M. Takatalo, H. Ma, R. Rice, T. Mustonen, D. P. C. Rice, Rab23 coordinates  
912 early osteogenesis by repressing FGF10-PERK1/2 and GLI1. *Elife.* **9**, 1–35 (2020).
- 913 76. M. Ansari, G. Poke, Q. Ferry, K. Williamson, R. Aldridge, A. M. Meynert, H. Bengani, C.  
914 Y. Chan, H. Kayserili, Ş. Avci, R. C. M. Hennekam, A. K. Lampe, E. Redeker, T.  
915 Homfray, A. Ross, M. F. Smeland, S. Mansour, M. J. Parker, J. A. Cook, M. Splitt, R. B.  
916 Fisher, A. Fryer, A. C. Magee, A. Wilkie, A. Barnicoat, A. F. Brady, N. S. Cooper, C.  
917 Mercer, C. Deshpande, C. P. Bennett, D. T. Pilz, D. Ruddy, D. Cilliers, D. S. Johnson, D.  
918 Josifova, E. Rosser, E. M. Thompson, E. Wakeling, E. Kinning, F. Stewart, F. Flinter, K.  
919 M. Girisha, H. Cox, H. V. Firth, H. Kingston, J. S. Wee, J. A. Hurst, J. Clayton-Smith, J.  
920 Tolmie, J. Vogt, K. Tatton-Brown, K. Chandler, K. Prescott, L. Wilson, M. Behnam, M.  
921 McEntagart, R. Davidson, S. A. Lynch, S. Sisodiya, S. G. Mehta, S. A. McKee, S.  
922 Mohammed, S. Holden, S. M. Park, S. E. Holder, V. Harrison, V. McConnell, W. K. Lam,  
923 A. J. Green, D. Donnai, M. Bitner-Glindzicz, D. E. Donnelly, C. Nellåker, M. S. Taylor, D.  
924 R. FitzPatrick, Genetic heterogeneity in Cornelia de Lange syndrome (CdLS) and CdLS-  
925 like phenotypes with observed and predicted levels of mosaicism. *J. Med. Genet.* **51**, 659–  
926 668 (2014).
- 927 77. W. L. Jungers, J. G. Fleagle, Postnatal growth allometry of the extremities in *Cebus*  
928 *albifrons* and *Cebus apella*: A longitudinal and comparative study. *Am. J. Phys. Anthropol.*  
929 **53**, 471–478 (1980).
- 930 78. C. McQueen, M. Towers, Establishing the pattern of the vertebrate limb. *Dev.* **147** (2020),  
931 doi:10.1242/dev.177956.
- 932 79. M. B. Costello, D. M. Fragaszy, Prehension in *Cebus* and *Saimiri*: I. Grip type and hand  
933 preference. *Am. J. Primatol.* **15**, 235–245 (1988).
- 934 80. V. Truppa, P. Carducci, G. Sabbatini, Object grasping and manipulation in capuchin  
935 monkeys (genera *Cebus* and *Sapajus*). *Biol. J. Linn. Soc.* **127**, 563–582 (2019).
- 936 81. K. L. Allen, R. F. Kay, Dietary quality and encephalization in platyrrhine primates. *Proc.*



- 937 *Biol. Sci.* **279**, 715–21 (2012).
- 938 82. L. P. C. dos Santos, “Parâmetros nutricionais da dieta de duas populações de macacos-  
939 prego: *Sapajus libidinosus* no ecótono Cerrado/Caatinga e *Sapajus nigritus* na Mata  
940 Atlântica”, thesis, Universidade de São Paulo, São Paulo (2015).
- 941 83. M. G. M. Lima, J. C. Buckner, J. de S. e. Silva-Júnior, A. Aleixo, A. B. Martins, J. P.  
942 Boubli, A. Link, I. P. Farias, M. N. da Silva, F. Röhe, H. Queiroz, K. L. Chiou, A. Di  
943 Fiore, M. E. Alfaro, J. W. Lynch Alfaro, Capuchin monkey biogeography: understanding  
944 *Sapajus* Pleistocene range expansion and the current sympatry between *Cebus* and *Sapajus*.  
945 *J. Biogeogr.* **44**, 810–820 (2017).
- 946 84. J. A. Chapman, I. Ho, S. Sunkara, S. Luo, G. P. Schroth, D. S. Rokhsar, Meraculous: *de*  
947 *novo* genome assembly with short paired-end reads. *PLoS One.* **6**, e23501 (2011).
- 948 85. G. Marçais, C. Kingsford, A fast, lock-free approach for efficient parallel counting of  
949 occurrences of *k*-mers. *Bioinformatics.* **27**, 764–770 (2011).
- 950 86. B. Chevreur, T. Pfisterer, B. Drescher, A. J. Driesel, W. E. G. Müller, T. Wetter, S. Suhai,  
951 Using the miraEST assembler for reliable and automated mRNA transcript assembly and  
952 SNP detection in sequenced ESTs. *Genome Res.* **14**, 1147–1159 (2004).
- 953 87. C. Hahn, L. Bachmann, B. Chevreur, Reconstructing mitochondrial genomes directly from  
954 genomic next-generation sequencing reads—a baiting and iterative mapping approach.  
955 *Nucleic Acids Res.* **41**, e129–e129 (2013).
- 956 88. A. F. A. Smit, R. Hubley, P. Green, RepeatMasker Open-4.0 2013-2015. Available at  
957 <http://www.repeatmasker.org>.
- 958 89. A. F. A. Smit, R. Hubley, RepeatModeler Open-1.0. 2008-2015. Available at  
959 <http://www.repeatmasker.org>.
- 960 90. M. Stanke, O. Keller, I. Gunduz, A. Hayes, S. Waack, B. Morgenstern, AUGUSTUS: *ab*  
961 *initio* prediction of alternative transcripts. *Nucleic Acids Res.* **34**, W435–W439 (2006).
- 962 91. S. Götz, J. M. García-Gómez, J. Terol, T. D. Williams, S. H. Nagaraj, M. J. Nueda, M.  
963 Robles, M. Talón, J. Dopazo, A. Conesa, High-throughput functional annotation and data  
964 mining with the Blast2GO suite. *Nucleic Acids Res.* **36**, 3420–3435 (2008).
- 965 92. L. Li, C. J. Stoeckert, D. S. Roos, OrthoMCL: identification of ortholog groups for  
966 eukaryotic genomes. *Genome Res.* **13**, 2178–2189 (2003).
- 967 93. K. Katoh, D. M. Standley, MAFFT multiple sequence alignment software version 7:  
968 improvements in performance and usability. *Mol. Biol. Evol.* **30**, 772–780 (2013).
- 969 94. R. M. Waterhouse, M. Seppey, F. A. Simão, M. Manni, P. Ioannidis, G. Klioutchnikov, E.  
970 V. Kriventseva, E. M. Zdobnov, BUSCO applications from quality assessments to gene  
971 prediction and phylogenomics. *Mol. Biol. Evol.* **35**, 543–548 (2018).
- 972 95. A. M. Bolger, M. Lohse, B. Usadel, Trimmomatic: a flexible trimmer for Illumina  
973 sequence data. *Bioinformatics.* **30**, 2114–2120 (2014).
- 974 96. G. W. Vulture, F. J. Sedlazeck, M. Nattestad, C. J. Underwood, H. Fang, J. Gurtowski, M.  
975 C. Schatz, GenomeScope: Fast reference-free genome profiling from short reads.  
976 *Bioinformatics.* **33**, 2202–2204 (2017).
- 977 97. H. Sun, J. Ding, M. Piednoël, K. Schneeberger, FindGSE: Estimating genome size  
978 variation within human and *Arabidopsis* using *k*-mer frequencies. *Bioinformatics.* **34**, 550–  
979 557 (2018).
- 980 98. S. Liu, Y. Liu, X. Yang, C. Tong, D. Edwards, I. A. P. Parkin, M. Zhao, J. Ma, J. Yu, S.  
981 Huang, X. Wang, J. Wang, K. Lu, Z. Fang, I. Bancroft, T.-J. Yang, Q. Hu, X. Wang, Z.  
982 Yue, L. Li, Haojie Yang, J. Wu, Q. Zhou, W. Wang, G. J. King, J. C. Pires, C. Lu, Z. Wu,  
983 P. Sampath, Z. Wang, H. Guo, S. Pan, L. Yang, J. Min, D. Zhang, D. Jin, W. Li, H.  
984 Belcram, J. Tu, M. Guan, C. Qi, D. Du, J. Li, L. Jiang, J. Batley, A. G. Sharpe, B.-S. Park,  
985 P. Ruperao, F. Cheng, N. E. Waminal, Y. Huang, C. Dong, L. Wang, J. Li, Z. Hu, M.  
986 Zhuang, Y. Huang, J. Huang, J. Shi, D. Mei, J. Liu, T.-H. Lee, J. Wang, H. Jin, Z. Li, X.

- 987 Li, J. Zhang, L. Xiao, Y. Zhou, Z. Liu, X. Liu, R. Qin, X. Tang, W. Liu, Y. Wang, Y.  
988 Zhang, J. Lee, H. H. Kim, F. Denoeud, X. Xu, X. Liang, W. Hua, X. Wang, J. Wang, B.  
989 Chalhoub, A. H. Paterson, The *Brassica oleracea* genome reveals the asymmetrical  
990 evolution of polyploid genomes. *Nat. Commun.* **5**, 1–11 (2014).
- 991 99. L. Song, L. Florea, Rcorrector: efficient and accurate error correction for Illumina RNA-  
992 seq reads. *Gigascience.* **4**, s13742–015 (2015).
- 993 100. C. Quast, E. Pruesse, P. Yilmaz, J. Gerken, T. Schweer, P. Yarza, J. Peplies, F. O.  
994 Glöckner, The SILVA ribosomal RNA gene database project: improved data processing  
995 and web-based tools. *Nucleic Acids Res.* **41**, D590–D596 (2012).
- 996 101. B. Langmead, S. L. Salzberg, Fast gapped-read alignment with Bowtie 2. *Nat. Methods.* **9**,  
997 357–359 (2012).
- 998 102. M. Johnson, I. Zaretskaya, Y. Raytselis, Y. Merezuk, S. McGinnis, T. L. Madden, NCBI  
999 BLAST: a better web interface. *Nucleic Acids Res.* **36**, W5–W9 (2008).
- 1000 103. M. G. Grabherr, B. J. Haas, M. Yassour, J. Z. Levin, D. A. Thompson, I. Amit, X.  
1001 Adiconis, L. Fan, R. Raychowdhury, Q. Zeng, Z. Chen, E. Mauceli, N. Hacohen, A.  
1002 Gnirke, N. Rhind, F. di Palma, B. W. Birren, C. Nusbaum, K. Lindblad-Toh, N. Friedman,  
1003 A. Regev, Trinity: reconstructing a full-length transcriptome without a genome from RNA-  
1004 Seq data. *Nat. Biotechnol.* **29**, 644–652 (2011).
- 1005 104. A. Dobin, C. A. Davis, F. Schlesinger, J. Drenkow, C. Zaleski, S. Jha, P. Batut, M.  
1006 Chaisson, T. R. Gingeras, STAR: ultrafast universal RNA-seq aligner. *Bioinformatics.* **29**,  
1007 15–21 (2013).
- 1008 105. C. Trapnell, A. Roberts, L. Goff, G. Pertea, D. Kim, D. R. Kelley, H. Pimentel, S. L.  
1009 Salzberg, J. L. Rinn, L. Pachter, Differential gene and transcript expression analysis of  
1010 RNA-seq experiments with TopHat and Cufflinks. *Nat. Protoc.* **7**, 562–578 (2012).
- 1011 106. M. A. Campbell, B. J. Haas, J. P. Hamilton, S. M. Mount, C. R. Buell, Comprehensive  
1012 analysis of alternative splicing in rice and comparative analyses with *Arabidopsis*. *BMC*  
1013 *Genomics.* **7**, 1–17 (2006).
- 1014 107. M. Carruthers, A. A. Yurchenko, J. J. Augley, C. E. Adams, P. Herzyk, K. R. Elmer, *De*  
1015 *novo* transcriptome assembly, annotation and comparison of four ecological and  
1016 evolutionary model salmonid fish species. *BMC Genomics.* **19**, 1–17 (2018).
- 1017 108. W. Li, A. Godzik, CD-hit: a fast program for clustering and comparing large sets of protein  
1018 or nucleotide sequences. *Bioinformatics.* **22**, 1658–1659 (2006).
- 1019 109. B. Buchfink, C. Xie, D. H. Huson, Fast and sensitive protein alignment using DIAMOND.  
1020 *Nat. Methods.* **12**, 59–60 (2015).
- 1021 110. W. J. Kent, BLAT—the BLAST-like alignment tool. *Genome Res.* **12**, 656–664 (2002).
- 1022 111. W. Bao, K. K. Kojima, O. Kohany, Repbase Update, a database of repetitive elements in  
1023 eukaryotic genomes. *Mob. DNA.* **6**, 1–6 (2015).
- 1024 112. A. Piovesan, M. C. Pelleri, F. Antonaros, P. Strippoli, M. Caracausi, L. Vitale, On the  
1025 length, weight and GC content of the human genome. *BMC Res. Notes.* **12**, 1–7 (2019).
- 1026 113. P. Jones, D. Binns, H.-Y. Chang, M. Fraser, W. Li, C. McAnulla, H. McWilliam, J.  
1027 Maslen, A. Mitchell, G. Nuka, S. Pesseat, A. F. Quinn, A. Sangrador-Vegas, M.  
1028 Scheremetjew, S.-Y. Yong, R. Lopez, S. Hunter, InterProScan 5: genome-scale protein  
1029 function classification. *Bioinformatics.* **30**, 1236–1240 (2014).
- 1030 114. A. C. Beichman, K. P. Koepfli, G. Li, W. Murphy, P. Dobrynin, S. Kliver, M. T. Tinker,  
1031 M. J. Murray, J. Johnson, K. Lindblad-Toh, E. K. Karlsson, K. E. Lohmueller, R. K.  
1032 Wayne, Aquatic adaptation and depleted diversity: a deep dive into the genomes of the sea  
1033 otter and giant otter. *Mol. Biol. Evol.* **36**, 2631–2655 (2019).
- 1034 115. S. Mallick, S. Gnerre, P. Muller, D. Reich, The difficulty of avoiding false positives in  
1035 genome scans for natural selection. *Genome Res.* **19**, 922–933 (2009).
- 1036 116. W. Fletcher, Z. Yang, The effect of insertions, deletions, and alignment errors on the

- 1037 branch-site test of positive selection. *Mol. Biol. Evol.* **27**, 2257–2267 (2010).
- 1038 117. P. Markova-Raina, D. Petrov, High sensitivity to aligner and high rate of false positives in  
1039 the estimates of positive selection in the 12 *Drosophila* genomes. *Genome Res.* **21**, 863–  
1040 874 (2011).
- 1041 118. Z. Yang, M. Dos Reis, Statistical properties of the branch-site test of positive selection.  
1042 *Mol. Biol. Evol.* **28**, 1217–1228 (2011).
- 1043 119. G. Jordan, N. Goldman, The effects of alignment error and alignment filtering on the  
1044 sitewise detection of positive selection. *Mol. Biol. Evol.* **29**, 1125–1139 (2012).
- 1045 120. T. B. Sackton, Studying natural selection in the era of ubiquitous genomes. *Trends Genet.*  
1046 **36**, 792–803 (2020).
- 1047 121. M. S. Springer, R. W. Meredith, J. Gatesy, C. A. Emerling, J. Park, C. A. Fisher, W. J.  
1048 Murphy, Macroevolutionary dynamics and historical biogeography of primate  
1049 diversification inferred from a species supermatrix. *PLoS One.* **7**, e49521 (2012).
- 1050 122. E. Maldonado, D. Almeida, T. Escalona, I. Khan, V. Vasconcelos, A. Antunes, LMAP:  
1051 Lightweight Multigene Analyses in PAML. *BMC Bioinformatics.* **17**, 1–46 (2016).
- 1052 123. R. Nielsen, C. Bustamante, A. G. Clark, S. Glanowski, T. B. Sackton, M. J. Hubisz, A.  
1053 Fledel-Alon, D. M. Tanenbaum, D. Civello, T. J. White, J. J. Sninsky, M. D. Adams, M.  
1054 Cargill, A scan for positively selected genes in the genomes of humans and chimpanzees.  
1055 *PLoS Biol.* **3**, 0976–0985 (2005).
- 1056 124. T. S. Mikkelsen, L. W. Hillier, E. E. Eichler, M. C. Zody, D. B. Jaffe, S. P. Yang, W.  
1057 Enard, I. Hellmann, K. Lindblad-Toh, T. K. Altheide, N. Archidiacono, P. Bork, J. Butler,  
1058 J. L. Chang, Z. Cheng, A. T. Chinwalla, P. Dejong, K. D. Delehaunty, C. C. Fronick, L. L.  
1059 Fulton, Y. Gilad, G. Glusman, S. Gnerre, T. A. Graves, T. Hayakawa, K. E. Hayden, X.  
1060 Huang, H. Ji, W. J. Kent, M. C. King, E. J. Kulbokas, M. K. Lee, G. Liu, C. Lopez-Otin, K.  
1061 D. Makova, O. Man, E. R. Mardis, E. Mauceli, T. L. Miner, W. E. Nash, J. O. Nelson, S.  
1062 Pääbo, N. J. Patterson, C. S. Pohl, K. S. Pollard, K. Prüfer, X. S. Puente, D. Reich, M.  
1063 Rocchi, K. Rosenbloom, M. Ruvolo, D. J. Richter, S. F. Schaffner, A. F. A. Smit, S. M.  
1064 Smith, M. Suyama, J. Taylor, D. Torrents, E. Tuzun, A. Varki, G. Velasco, M. Ventura, J.  
1065 W. Wallis, M. C. Wendl, R. K. Wilson, E. S. Lander, R. H. Waterston, Initial sequence of  
1066 the chimpanzee genome and comparison with the human genome. *Nature.* **437**, 69–87  
1067 (2005).
- 1068 125. G. C. Nickel, D. L. Tefft, K. Goglin, M. D. Adams, An empirical test for branch-specific  
1069 positive selection. *Genetics.* **179**, 2183–2193 (2008).
- 1070 126. G. Jordan, “Analysis of alignment error and sitewise constraint in mammalian comparative  
1071 genomics”, thesis, University of Cambridge, Cambridge (2011).
- 1072 127. Y. Benjamini, Y. Hochberg, Controlling the false discovery rate: a practical and powerful  
1073 approach to multiple testing. *J. R. Stat. Soc. Ser. B.* **57**, 289–300 (1995).
- 1074 128. G. Stelzer, N. Rosen, I. Plaschkes, S. Zimmerman, M. Twik, S. Fishilevich, T. I. Stein, R.  
1075 Nudel, I. Lieder, Y. Mazor, S. Kaplan, D. Dahary, D. Warshawsky, Y. Guan-Golan, A.  
1076 Kohn, N. Rappaport, M. Safran, D. Lancet, The GeneCards suite: from gene data mining to  
1077 disease genome sequence analyses. *Curr. Protoc. Bioinforma.* **54**, 1–30 (2016).
- 1078 129. M. Simões-Costa, M. Stone, M. E. Bronner, Axud1 integrates Wnt signaling and  
1079 transcriptional inputs to drive neural crest formation. *Dev. Cell.* **34**, 544–554 (2015).
- 1080 130. E. Flex, M. Jaiswal, F. Pantaleoni, S. Martinelli, M. Strullu, E. K. Fansa, A. Caye, A. De  
1081 Luca, F. Lepri, R. Dvorsky, L. Pannone, S. Paolacci, S. C. Zhang, V. Fodale, G.  
1082 Bocchinfuso, C. Rossi, E. M. M. Burkitt-Wright, A. Farrotti, E. Stellacci, S. Cecchetti, R.  
1083 Ferese, L. Bottero, S. Castro, O. Fenneteau, B. Brethon, M. Sanchez, A. E. Roberts, H. G.  
1084 Yntema, I. Van Der Burgt, P. Cianci, M. L. Bondeson, M. C. Digilio, G. Zampino, B. Kerr,  
1085 Y. K. Aoki, M. L. Loh, A. Palleschi, E. Di Schiavi, A. Caré, A. Selicorni, B. Dallapiccola,  
1086 I. C. Cirstea, L. Stella, M. Zenker, B. D. Gelb, H. Cavé, M. R. Ahmadian, M. Tartaglia,

- 1087 Activating mutations in RRAS underlie a phenotype within the RASopathy spectrum and  
1088 contribute to leukaemogenesis. *Hum. Mol. Genet.* **23**, 4315–4327 (2014).
- 1089 131. G. Grimaldi, B. Vagaska, O. Ievglevskiy, E. Kondratskaya, J. Glover, J. Matthews, Loss of  
1090 Tiparp results in aberrant layering of the cerebral cortex. *eNeuro.* **6**, 1–15 (2019).
- 1091 132. M. Kono, M. L. Allende, R. L. Proia, Sphingosine-1-phosphate regulation of mammalian  
1092 development. *Biochim. Biophys. Acta.* **1781**, 435–441 (2008).
- 1093 133. G. He, S. Tavella, K. P. Hanley, M. Self, G. Oliver, R. Grifone, N. Hanley, C. Ward, N.  
1094 Bobola, Inactivation of Six2 in mouse identifies a novel genetic mechanism controlling  
1095 development and growth of the cranial base. *Dev. Biol.* **344**, 720–730 (2010).
- 1096 134. P. Wend, K. Wend, S. A. Krum, G. A. Miranda-Carboni, The role of WNT10B in  
1097 physiology and disease. *Acta Physiol.* **204**, 34–51 (2012).
- 1098 135. K. Kania, F. Colella, A. H. K. Riemen, H. Wang, K. A. Howard, T. Aigner, F. Dell’Accio,  
1099 T. D. Capellini, A. J. Roelofs, C. De Bari, Regulation of Gdf5 expression in joint  
1100 remodelling, repair and osteoarthritis. *Sci. Rep.* **10**, 1–11 (2020).
- 1101 136. P. Buxton, C. Edwards, C. W. Archer, P. Francis-West, Growth/differentiation factor-5  
1102 (GDF-5) and skeletal development. *J. Bone Jt. Surg.* **83**, S23–S30 (2001).
- 1103 137. S. Beck-Cormier, M. Escande, C. Souilhol, S. Vandormael-Pournin, S. Sourice, P. Pilet, C.  
1104 Babinet, M. Cohen-Tannoudji, Notchless is required for axial skeleton formation in mice.  
1105 *PLoS One.* **9**, 1–10 (2014).
- 1106 138. C. L. Smith, M. D. Tallquist, PDGF function in diverse neural crest cell populations. *Cell*  
1107 *Adhes. Migr.* **4**, 561–566 (2010).
- 1108 139. C. Niehrs, Function and biological roles of the Dickkopf family of Wnt modulators.  
1109 *Oncogene.* **25**, 7469–7481 (2006).
- 1110 140. J. E. Lee, J. G. Gleeson, Cilia in the nervous system: Linking cilia function and  
1111 neurodevelopmental disorders. *Curr. Opin. Neurol.* **24**, 98–105 (2011).
- 1112 141. E. N. Firat-Karalar, The ciliopathy gene product Cep290 is required for primary cilium  
1113 formation and microtubule network organization. *Turkish J. Biol.* **42**, 371–381 (2018).
- 1114 142. S. J. Neufeld, F. Wang, J. Cobb, Genetic interactions between Shox2 and Hox genes during  
1115 the regional growth and development of the mouse limb. *Genetics.* **198**, 1117–1126 (2014).
- 1116 143. C. Tickle, M. Towers, Sonic hedgehog signaling in limb development. *Front. Cell Dev.*  
1117 *Biol.* **5**, 1–19 (2017).
- 1118 144. J. Zákány, M. Kmita, D. Duboule, A dual role for Hox genes in limb anterior-posterior  
1119 asymmetry. *Science (80).* **304**, 1669–1672 (2004).
- 1120 145. L. A. Wyngaarden, S. Hopyan, Plasticity of proximal-distal cell fate in the mammalian  
1121 limb bud. *Dev. Biol.* **313**, 225–233 (2008).
- 1122 146. Z. Iqbal, P. Cejudo-Martin, A. de Brouwer, B. van der Zwaag, P. Ruiz-Lozano, M. C.  
1123 Scimia, J. D. Lindsey, R. Weinreb, B. Albrecht, A. Megarbane, Y. Alanay, Z. Ben-Neriah,  
1124 M. Amenduni, R. Artuso, J. A. Veltman, E. van Beusekom, A. Oudakker, J. L. Millán, R.  
1125 Hennekam, B. Hamel, S. A. Courtneidge, H. van Bokhoven, Disruption of the podosome  
1126 adaptor protein TKS4 (SH3PXD2B) causes the skeletal dysplasia, eye, and cardiac  
1127 abnormalities of Frank-Ter Haar syndrome. *Am. J. Hum. Genet.* **86**, 254–261 (2010).
- 1128 147. N. Funato, Y. Taga, L. E. Laurie, C. Tometsuka, M. Kusubata, K. Ogawa-Goto, The  
1129 transcription factor HAND1 is involved in cortical bone mass through the regulation of  
1130 collagen expression. *Int. J. Mol. Sci.* **21**, 1–15 (2020).
- 1131 148. V. Ouellet, P. M. Siegel, CCN3 modulates bone turnover and is a novel regulator of  
1132 skeletal metastasis. *J. Cell Commun. Signal.* **6**, 73–85 (2012).
- 1133 149. R. Haraguchi, R. Kitazawa, K. Mori, R. Tachibana, H. Kiyonari, Y. Imai, T. Abe, S.  
1134 Kitazawa, SFRP4-dependent Wnt signal modulation is critical for bone remodeling during  
1135 postnatal development and age-related bone loss. *Sci. Rep.* **6**, 1–14 (2016).
- 1136 150. P. O. Simsek Kiper, H. Saito, F. Gori, S. Unger, E. Hesse, K. Yamana, R. Kiviranta, N.



- 1137 Solban, J. Liu, R. Brommage, K. Boduroglu, L. Bonafé, B. Campos-Xavier, E. Dikoglu, R.  
1138 Eastell, F. Gossiel, K. Harshman, G. Nishimura, K. M. Girisha, B. J. Stevenson, H. Takita,  
1139 C. Rivolta, A. Superti-Furga, R. Baron, Cortical-bone fragility — insights from sFRP4  
1140 deficiency in Pyle’s disease. *N. Engl. J. Med.* **374**, 2553–2562 (2016).
- 1141 151. S. Sipione, J. Monyror, D. Galleguillos, N. Steinberg, V. Kadam, Gangliosides in the brain:  
1142 physiology, pathophysiology and therapeutic applications. *Front. Neurosci.* **14**, 1–24  
1143 (2020).
- 1144 152. E. C. Pandolfi, K. J. Tonsfeldt, H. M. Hoffmann, P. L. Mellon, Deletion of the  
1145 homeodomain protein Six6 from GnRH neurons decreases GnRH gene expression,  
1146 resulting in infertility. *Endocrinology.* **160**, 2151–2164 (2019).
- 1147 153. A. Vera, K. Stanic, H. Montecinos, M. Torrejón, S. Marcellini, T. Caprile, SCO-spondin  
1148 from embryonic cerebrospinal fluid is required for neurogenesis during early brain  
1149 development. *Front. Cell. Neurosci.* **7**, 1–14 (2013).
- 1150 154. K. H. Flippo, S. Strack, Mitochondrial dynamics in neuronal injury, development and  
1151 plasticity. *J. Cell Sci.* **130**, 671–681 (2017).
- 1152 155. J. H. Jhamandas, V. Goncharuk, Role of neuropeptide FF in central cardiovascular and  
1153 neuroendocrine regulation. *Front. Endocrinol.* **4**, 1–6 (2013).
- 1154 156. E. Angelopoulou, C. Quignon, L. J. Kriegsfeld, V. Simonneaux, Functional implications of  
1155 RFRP-3 in the central control of daily and seasonal rhythms in reproduction. *Front.*  
1156 *Endocrinol.* **10**, 1–15 (2019).
- 1157 157. L. J. Kriegsfeld, K. J. Jennings, G. E. Bentley, K. Tsutsui, Gonadotrophin-inhibitory  
1158 hormone and its mammalian orthologue RFamide-related peptide-3: Discovery and  
1159 functional implications for reproduction and stress. *J. Neuroendocrinol.* **30**, 1–13 (2018).
- 1160 158. Y. Zhao, J. Wu, X. Wang, H. Jia, D.-N. Chen, J.-D. Li, Prokineticins and their G protein-  
1161 coupled receptors in health and disease. *Prog. Mol. Biol. Transl. Sci.* **161**, 149–179 (2019).
- 1162 159. C. Jia, M. P. Keasey, H. M. Malone, C. Lovins, R. R. Sante, V. Razskazovskiy, T. Hagg,  
1163 Vitronectin from brain pericytes promotes adult forebrain neurogenesis by stimulating  
1164 CNTF. *Exp. Neurol.* **312**, 20–32 (2019).
- 1165 160. P. O. Frappart, Y. Lee, J. Lamont, P. J. McKinnon, BRCA2 is required for neurogenesis  
1166 and suppression of medulloblastoma. *EMBO J.* **26**, 2732–2742 (2007).
- 1167 161. L. Lo, E. L. Dormand, D. J. Anderson, Late-emigrating neural crest cells in the roof plate  
1168 are restricted to a sensory fate by GDF7. *Proc. Natl. Acad. Sci. U. S. A.* **102**, 7192–7197  
1169 (2005).
- 1170 162. P. Joshi, C. Bodnya, M. L. Rasmussen, A. I. Romero-Morales, A. Bright, V. Gama,  
1171 Modeling the function of BAX and BAK in early human brain development using iPSC-  
1172 derived systems. *Cell Death Dis.* **11** (2020), doi:10.1038/s41419-020-03002-x.
- 1173 163. J. Xie, Y. Jin, G. Wang, The role of SCF ubiquitin-ligase complex at the beginning of life.  
1174 *Reprod. Biol. Endocrinol.* **17**, 1–9 (2019).
- 1175 164. C. Wang, X. Kang, L. Zhou, Z. Chai, Q. Wu, R. Huang, H. Xu, M. Hu, X. Sun, S. Sun, J.  
1176 Li, R. Jiao, P. Zuo, L. Zheng, Z. Yue, Z. Zhou, Synaptotagmin-11 is a critical mediator of  
1177 parkin-linked neurotoxicity and Parkinson’s disease-like pathology. *Nat. Commun.* **9**, 1–14  
1178 (2018).
- 1179 165. M. Jakimiec, J. Paprocka, R. Smigiel, CDKL5 deficiency disorder—a complex epileptic  
1180 encephalopathy. *Brain Sci.* **10**, 1–9 (2020).
- 1181 166. S. Chauvin, A. Sobel, Neuronal stathmins: A family of phosphoproteins cooperating for  
1182 neuronal development, plasticity and regeneration. *Prog. Neurobiol.* **126**, 1–18 (2015).
- 1183 167. W. Jiang, M. Wei, M. Liu, Y. Pan, D. Cao, X. Yang, C. Zhang, Identification of protein  
1184 tyrosine phosphatase receptor type O (PTPRO) as a synaptic adhesion molecule that  
1185 promotes synapse formation. *J. Neurosci.* **37**, 9828–9843 (2017).
- 1186 168. Y. Ranjbar-Slamloo, Z. Fazlali, Dopamine and noradrenaline in the brain; overlapping or

- 1187 dissociate functions? *Front. Mol. Neurosci.* **12**, 1–8 (2020).
- 1188 169. E. Boudin, T. R. de Jong, T. C. R. Prickett, B. Lapauw, K. Toye, V. Van Hoof, I. Luyckx,  
1189 A. Verstraeten, H. S. A. Heymans, E. Dulfer, L. Van Laer, I. R. Berry, A. Dobbie, E. Blair,  
1190 B. Loeys, E. A. Espiner, J. M. Wit, W. Van Hul, P. Houpt, G. R. Mortier, Bi-allelic loss-of-  
1191 function mutations in the NPR-C receptor result in enhanced growth and connective tissue  
1192 abnormalities. *Am. J. Hum. Genet.* **103**, 288–295 (2018).
- 1193 170. Y. Guo, W. Pan, S. Liu, Z. Shen, Y. Xu, L. Hu, ERK/MAPK signalling pathway and  
1194 tumorigenesis (Review). *Exp. Ther. Med.*, 1997–2007 (2020).
- 1195 171. W. A. Buttemer, D. Abele, D. Costantini, From bivalves to birds: Oxidative stress and  
1196 longevity. *Funct. Ecol.* **24**, 971–983 (2010).
- 1197 172. A. P. Halestrap, The SLC16 gene family; structure, role and regulation in health and  
1198 disease. *Mol. Aspects Med.* **34**, 337–349 (2013).
- 1199  
1200

## 1201 **Acknowledgments**

1202 We thank Jonathon Rodgers and LSSA Support at UCLA for computational assistance; staff at  
1203 Dovetail Genomics, DNA Technologies Core (UC Davis), and TCGB (UCLA) for  
1204 sequencing assistance; Amelia Wilkes and the staff at the Language Research Center for  
1205 Mango’s care and the collection of her blood sample; staff at Yerkes National Primate  
1206 Research Center for tissue collection for RNAseq during Mango’s necropsy; the Broad  
1207 Institute, Amanda Melin, and Joe Orkin for generating the squirrel monkey and gracile  
1208 capuchin genomes used in this study; Stephen Nash for the use of his illustrations; Colin  
1209 Brand for his helpful comments; and the Institute for Society and Genetics (UCLA) and  
1210 Anthropology Dept. (University of Utah) for postdoctoral support for HB.

1211

## 1212 **Funding:**

1213 FAPESP grant 14/13237-1 (PI, JWL)  
1214 Start-up funding from the University of Utah (THW)

1215

## 1216 **Author contributions:**

1217 Conceptualisation: HB, JWL, PI  
1218 Sample & data collection: HB, JWL, SFB  
1219 Reference genome assembly analyses: HB  
1220 Positive selection & enrichment analyses: HB  
1221 Interpretation: HB, JWL, THW, PI  
1222 Supervision: JWL, THW  
1223 Writing—original draft: HB  
1224 Writing—review & editing: HB, THW, JWL, PI, SFB

1225

1226 **Competing interests:** Authors declare that they have no competing interests.

1227

1228 **Data and materials availability:** The reference genome, WGS and Chicago library  
1229 sequencing reads, and RNAseq reads for 17 tissues for our reference *Sapajus apella*  
1230 individual are available at NCBI BioProjects under the accession no. PRJNA717806  
1231 (<https://www.ncbi.nlm.nih.gov/bioproject/717806>) [\*\*to be released upon acceptance of  
1232 the manuscript for publication\*\*]. The version of the reference genome assembly used in  
1233 this study, as well as the mitochondrial genome assembly and annotation, are available on  
1234 a Zenodo repository (<https://doi.org/10.5281/zenodo.5225106>).

1235  
1236  
1237

1238  
1239  
1240  
1241  
1242

## Supplementary Materials

One supplementary document with extended methods and results, supplementary figures S1, S2 and S3, and supplementary tables S1, S2, S3, S5, S6, S7, S10, and S23. Supplementary tables S4, S8, S9, S11 to S22, and S24 to S44 are found as separate excel files.

**Table 2** Summary of gene set enrichment results for each cebid lineage including enriched terms, example genes, and test.

| Lineage                       | Summary                             | Enriched terms                                                                                                                                                                                                             | GO clust. | Example genes                              | Test    |
|-------------------------------|-------------------------------------|----------------------------------------------------------------------------------------------------------------------------------------------------------------------------------------------------------------------------|-----------|--------------------------------------------|---------|
| <b>Robust capuchin (H1)</b>   | Face & skeletal system development  | BP: face morphogenesis, skeletal system development, skeletal muscle tissue development, BMP signalling                                                                                                                    | Y         | NIPBL, SIX4, RAB23, CSRN1P1, WNT10B        | BM      |
|                               | Female sex differentiation          | BP: female sex differentiation, female gonad development, ovulation cycle process                                                                                                                                          | Y         | FSHB, NR1P1                                | BSM     |
|                               | Cilium                              | BP: regulation of cilium beat frequency; CC: MKS complex; UP: cilium, Bardet-Biedl syndrome                                                                                                                                | Y         | AHI1, CEP290                               | BM      |
|                               | Lipid metabolism                    | BP: lipid homeostasis, triglyceride-rich lipoprotein particle remodelling, ketone biosynthetic process, glycerol metabolic process; Disease: various                                                                       | N         | APOE, CETP                                 | BSM, BM |
|                               | Neurodegeneration & brain           | BP: negative regulation of glycoprotein metabolic process; Disease: Alzheimer's related, dementia                                                                                                                          | N         | APOE, ITM2B, 5HTR3B, NCAN, PROX2           | BM, BSM |
|                               | DNA replication & repair            | BP: DNA repair, post replication repair; MF: ERCC4-ERCC1 complex; UP, KEGG & BP: DNA replication                                                                                                                           | N         | ERCC4, POLI, APLF                          | BM      |
| <b>Gracile capuchin (H2)</b>  | Limbs & skeletal system development | BP: limb development, skeletal system morphogenesis; UP: developmental protein                                                                                                                                             | Y         | HOXC11, HOXD10, SHOX2                      | BM      |
|                               | Endosomes/vacuoles                  | BP: vacuole organisation; CC: endosome, endosome membrane                                                                                                                                                                  | N         | GM2A, PINK1, PLAA                          | BM      |
|                               | DNA damage & repair                 | BP: ds break repair; UP: DNA repair, DNA damage, mutator protein                                                                                                                                                           | N         | POLH, SLF1, TP53BP1                        | BM      |
| <b>Ancestral Cebinae (H3)</b> | Mitochondrion                       | BP: mitochondrial organisation; CC: mitochondrial protein complex, mitochondrial inner membrane; Disease: mitochondrial complex I deficiency; UP: mitochondrion                                                            | Y         | TWINK, FOXRED1, NDUFB9, NDUFS6             | BM      |
|                               | Hormones & neuropeptides            | BP: neuropeptide, hormone secretion & transport, signal release, peptide secretion; MF: hormone activity; Reactome: agmatine biosynthesis                                                                                  | Y         | TRH, NPFF, NPVF, CALY, CGA, AGMAT, HTR1F   | BM      |
|                               | Brain's ECM                         | Reactome: ECM proteoglycans                                                                                                                                                                                                | N         | BCAN, NCAN, VTN                            | BSM     |
|                               | Brain development                   | BP: CNS development; Disease: cognitive trait                                                                                                                                                                              | N         | GDF7, DBX1, LNPB                           | BSM, BM |
|                               | Circadian rhythms                   | BP: circadian rhythms                                                                                                                                                                                                      | N         | PER3, TIMELESS, PROK2                      | BM      |
|                               | Fertilisation                       | BP: fertilisation, sperm-cell recognition                                                                                                                                                                                  | N         | PRSS37, FETUB                              | BSM     |
|                               | Cilium                              | BP: cilium assembly, organisation, morphogenesis; CC: axoneme; UP: cilium                                                                                                                                                  | Y         | BBS7, CEP162, KATNP                        | BSM, BM |
|                               | Digit development                   | BP: embryonic digit morphogenesis                                                                                                                                                                                          | N         | LNPB                                       | BSM     |
| <b>Across-capuchins (H3a)</b> | Neurotransmission                   | BP: membrane/vesicle fusion, synaptic vesicle exocytosis, calcium ion-regulated exocytosis of neurotransmitter; CC: SNARE, clathrin, syntaxin binding                                                                      | Y         | SYT3, SYT11, SYT14, CASK                   | BM      |
|                               | Hormones & behaviour                | BP: regulation of hormone/peptide, endocrine hormone, gonadotropin secretion, regulation of behaviour; MF: hormone activity; UP: hormone, amidation                                                                        | Y         | HTR5B, FSHB, BSX, PRLH, GHRL, LEP, SRPX2   | BM      |
|                               | Circadian rhythms                   | BP: circadian rhythms; UP: biological rhythm                                                                                                                                                                               | N         | PER3, PROK2                                | BM      |
|                               | Mitochondrion                       | BP & Reactome: mitochondrial translation related; CC & UP: mitochondrion; CC: mitochondrial part                                                                                                                           | Y         | MRPL9, MRPL37, MRPL44, MRPS28              | BM      |
|                               | Nutrition & diet                    | BP: BCAA & leucine metabolic process; KEGG: BCAA degradation, riboflavin metabolism; Reactome: BCAA catabolism, biotin transport & metabolism                                                                              | N         | FLAD, MCCC1, MCCC2                         | BM      |
| <b>Ancestral Cebidae (H4)</b> | Cilium                              | BP: axonemal dynein complex assembly, cilium morphogenesis, assembly, & organisation; CC: motile cilium; UP: cilium, ciliopathy, primary ciliary dyskinesia, cilium biogenesis; Reactome: intraflagellar transport         | Y         | TMEM67, DRC1, IFT122                       | BM, BSM |
|                               | Sperm development & reproduction    | BP: spermatid development, male meiosis, piRNA metabolic process, DNA methylation, fertilisation, sexual reproduction; CC: CatSper complex; UP: spermatogenesis, flagellum; Reactome: sperm motility & taxes               | Y         | CATSPER3, CATSPERD, TOPAZ1, DEFB126, INHBA | BSM, BM |
|                               | Immunity                            | BP: I-kappaB kinase/NF-kappaB signalling & regulation, cellular response to endotoxins, T cell proliferation, adaptive immune & acute inflammatory responses; CC: T cell receptor complex; UP: adaptive immunity, immunity | Y         | RIPK2, CD4, CD8B, C7                       | BSM, BM |
|                               | Brain & nervous system              | CC: growth cone; Disease: ALS                                                                                                                                                                                              | N         | CDKL5, STMN4, SIGMAR1                      | BM      |
|                               | Neuromodulation                     | Reactome: orexin & neuropeptides FF & QRFP bind to their respective receptors                                                                                                                                              | N         | DBH, NPFFR2, HCRT                          | BSM     |

|                             |                               |                                                                                                                                                                                                 |   |                                           |         |
|-----------------------------|-------------------------------|-------------------------------------------------------------------------------------------------------------------------------------------------------------------------------------------------|---|-------------------------------------------|---------|
|                             | Aging                         | Disease: aging                                                                                                                                                                                  | N | WRN, SMPD1, CERS4, ADAM10, ACMSD          | BSM     |
| <b>Squirrel monkey (H5)</b> | Growth factors                | BP: response to growth factor; MF: growth factor activity, growth factor receptor binding; UP: growth factor                                                                                    | N | FGF1, TGFB1, GDF10, BMP15, BMPER, IGFALS  | BSM, BM |
|                             | Signalling cascades           | BP: regulation of ERK1 & ERK2 cascade, regulation of MAPK cascade                                                                                                                               | Y | DUSP6, TNFRSF1B, FGF20                    | BSM     |
|                             | Inflammation & immunity       | BP: cytokine-mediated signalling, interleukin-6 production; CC: cytokine receptor binding, chemokine activity; BP & UP: chemotaxis, inflammatory response; Reactome: signalling by interleukins | Y | IL6R, IL36A, CCL17, CCL20, CCL8, CD40     | BSM, BM |
|                             | Brain & nervous system        | BP: regulation of neuron differentiation, nervous system development, neurogenesis, dopamine biosynthetic process; Disease: Alzheimer's Disease                                                 | Y | DAO, NTF4, SOX11, LMX1A, SIX3, LHX4, NGFR | BSM, BM |
|                             | Anatomy & development         | BP: anatomical structure development, developmental process, fibroblast proliferation, photoreceptor maintenance                                                                                | Y | HOXB2, HOXB4, NOTO, TMEM88                | BSM, BM |
|                             | Peroxisome & oxidative stress | BP: cellular response to oxidative stress; CC & KEGG: peroxisome; MF: NADPH oxidase activator activity                                                                                          | N | SOD1, NOXO1, GLRX2, MPV17, OXR1           | BM      |
|                             | Mitoribosome & mitochondrion  | CC: mitochondrial large ribosomal SU; BP & Reactome: mitochondrial translational elongation/initiation/termination                                                                              | Y | MRPL{1,14,17,19,24,55}, COX16, COX11      | BM      |
|                             | Nutrient & energy metabolism  | BP: calcium ion homeostasis, response to metal ion, lactate transport, retinoid metabolism; KEGG: nutrient absorption                                                                           | Y | OPN1SW, RHO, PTH1R, FTH1, SLC16A3         | BSM, BM |

1243
